# Supplementary material for: Does a ‘direct’ transfer protocol reduce time to coronary angiography for patients with non-ST-elevation acute coronary syndromes? A prospective observational study
Source: PubMed Central journal article supplement — BMJ Open. 2014 Sep 29;4(9):e005525. doi: 10.1136/bmjopen-2014-005525 (PMC4179416; doi:10.1136/bmjopen-2014-005525), 2014-09-29
Supplement: bmjopen-2014-005525.draft_revisions.pdf [file bmjopen-2014-005525.draft_revisions.pdf]

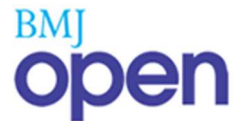

**A "DIRECT" TRANSFER PROTOCOL REDUCES TIME TO  
CORONARY ANGIOGRAPHY FOR PATIENTS WITH NON ST-  
ELEVATION ACUTE CORONARY SYNDROMES**

|                                 |                                                                                                                                                                                                                                                                                                                                                                                                                                                                                                                                                                                                                                                                                                                                                                                                                                                                                                   |
|---------------------------------|---------------------------------------------------------------------------------------------------------------------------------------------------------------------------------------------------------------------------------------------------------------------------------------------------------------------------------------------------------------------------------------------------------------------------------------------------------------------------------------------------------------------------------------------------------------------------------------------------------------------------------------------------------------------------------------------------------------------------------------------------------------------------------------------------------------------------------------------------------------------------------------------------|
| Journal:                        | <i>BMJ Open</i>                                                                                                                                                                                                                                                                                                                                                                                                                                                                                                                                                                                                                                                                                                                                                                                                                                                                                   |
| Manuscript ID:                  | bmjopen-2014-005034                                                                                                                                                                                                                                                                                                                                                                                                                                                                                                                                                                                                                                                                                                                                                                                                                                                                               |
| Article Type:                   | Research                                                                                                                                                                                                                                                                                                                                                                                                                                                                                                                                                                                                                                                                                                                                                                                                                                                                                          |
| Date Submitted by the Author:   | 13-Feb-2014                                                                                                                                                                                                                                                                                                                                                                                                                                                                                                                                                                                                                                                                                                                                                                                                                                                                                       |
| Complete List of Authors:       | Gallagher, Sean; Barts Health NHS Trust, Cardiology<br>Lovell, Matthew; Barts and the London NHS Trust, Cardiology<br>Jones, Dan; Barts and the London NHS Trust, Cardiology<br>Ferguson, Eileen; Barts and the London NHS Trust, Cardiology<br>Akhtar, Abid; Barts and the London NHS Trust, Cardiology<br>Buckhoree, Zia; Barts and the London NHS Trust, Cardiology<br>Wragg, Andrew; Barts and the London NHS Trust, Cardiology<br>Knight, Charles; Bartshealth NHS Trust, Department of Cardiology<br>Mathur, Anthony; Barts and the London NHS Trust, Cardiology<br>Smith, Elliot; Barts and the London NHS Trust, Cardiology<br>Cliffe, Samantha; Barts and the London NHS Trust, Cardiology<br>Archbold, Andrew; Barts and the London NHS Trust, Cardiology<br>Rothman, Martin; Barts and the London NHS Trust, Cardiology<br>Jain, Ajay; Bartshealth NHS Trust, Department of Cardiology |
| <b>Primary Subject Heading</b>: | Cardiovascular medicine                                                                                                                                                                                                                                                                                                                                                                                                                                                                                                                                                                                                                                                                                                                                                                                                                                                                           |
| Secondary Subject Heading:      | Cardiovascular medicine, Health economics                                                                                                                                                                                                                                                                                                                                                                                                                                                                                                                                                                                                                                                                                                                                                                                                                                                         |
| Keywords:                       | Coronary intervention < CARDIOLOGY, Ischaemic heart disease < CARDIOLOGY, Myocardial infarction < CARDIOLOGY                                                                                                                                                                                                                                                                                                                                                                                                                                                                                                                                                                                                                                                                                                                                                                                      |
|                                 |                                                                                                                                                                                                                                                                                                                                                                                                                                                                                                                                                                                                                                                                                                                                                                                                                                                                                                   |

SCHOLARONE™  
Manuscripts

1  
2  
3 **A “DIRECT” TRANSFER PROTOCOL REDUCES TIME TO CORONARY**  
4 **ANGIOGRAPHY FOR PATIENTS WITH NON ST-ELEVATION ACUTE**  
5 **CORONARY SYNDROMES**  
6  
7

8  
9 Gallagher SM <sup>1,2,3</sup>, Lovell MJ <sup>1</sup>, Jones DA <sup>1,2,4</sup>, Ferguson E <sup>1</sup>, Ahktar A <sup>1</sup>, Buckhoree Z <sup>1</sup>, Wragg A <sup>1,2</sup>,  
10 Knight CJ <sup>1,2</sup>, Mathur A <sup>1,2,4</sup>, Smith EJ <sup>1,2</sup>, Cliffe S <sup>1</sup>, Archbold RA <sup>1,2</sup>, Rothman MT <sup>1</sup> and Jain AK <sup>1,2</sup>  
11

12  
13  
14 <sup>1</sup> Department of Cardiology, Barts Health NHS Trust

15  
16 <sup>2</sup> NIHR Cardiovascular Biomedical Research Unit, London Chest Hospital, London

17  
18 <sup>3</sup> Department of Translational Medicine and Therapeutics, William Harvey Research, Queen Mary College,  
19 London

20  
21 <sup>4</sup> Department of Clinical Pharmacology, William Harvey Research Institute, Queen Mary College, London  
22  
23  
24  
25

26 Corresponding address:  
27

28 Dr AK Jain  
29

30 Department of Cardiology,  
31

32 London Chest Hospital,  
33

34 Bonner Road,  
35

36 London,  
37

38 E2 9JX  
39

40 Phone number: 020 898 32248  
41

42 Email: [ajay.jain@bartshealth.nhs.uk](mailto:ajay.jain@bartshealth.nhs.uk)  
43  
44  
45  
46  
47  
48  
49  
50  
51  
52  
53  
54  
55  
56  
57  
58  
59  
60

## Abstract

**Objective:** National guidelines recommend 'early' coronary angiography within 96 h of presentation for patients with non-ST elevation acute coronary syndromes (NSTEMI-ACS). Most patients with NSTEMI-ACS present to their district general hospital (DGH), and await transfer to the regional cardiac centre for angiography. This care model has inherent time delays, and delivery of timely angiography is problematic. The objective of this study was to assess a novel clinical care pathway for the management of NSTEMI-ACS, known locally as the Heart Attack Centre-Extension or HAC-X designed to rapidly identify patients with NSTEMI-ACS while in DGH emergency departments (ED) and facilitate transfer to the regional interventional centre for 'early' coronary angiography.

**Methods:** This was an observational study of 702 patients divided into two groups; 391 patients treated before the instigation of the HAC-X pathway (Pre-HACX), and 311 patients treated via the novel pathway (Post-HACX). Our primary study end point was time from ED admission to coronary angiography. We also assessed the length of hospital stay.

**Results:** Median time from ED admission to coronary angiography was 7.2 (IQR 5.1 - 10.2) days pre-HAC-X compared to 1.0 (IQR 0.7 - 2.0) day post-HAC-X ( $p < 0.001$ ). Median length of hospital stay was 3.0 (IQR 2.0-6.0) days post-HAC-X v 9.0 (IQR 6.0-14.0) days pre-HAC-X ( $p < 0.0005$ ). This equates to a reduction of six hospital bed days per NSTEMI-ACS admission.

**Conclusions:** The introduction of this novel care pathway was associated with significant reductions in time to angiography and in total hospital bed occupancy for patients with NSTEMI-ACS.

## Article summary

### Article focus

This paper describes the effect of a novel care pathway for patients with NSTEMI-ACS upon waiting times for coronary angiography and total length of hospital stay when it was introduced at a large regional interventional cardiac centre in East London.

### Key messages

After the introduction of this novel care pathway,

1. Time from hospital admission to coronary angiography for patients with NSTEMI-ACS was reduced by 6 days.
2. Length of hospital admission for patients with NSTEMI-ACS was reduced by two-thirds.

The use of this model modified according to local circumstances could be applied nationally to streamline the management of NSTEMI-ACS patients.

### Strengths and limitations of this paper

This paper describes the introduction of the first clinical pathway of its type in UK. Logistical delays in delivering early angiography for patients with NSTEMI-ACS remains a problem, thus our real-world data demonstrating a streamlined care pathway for these high-risk patients is extremely relevant.

This is not randomized data. The paper describes management of patients with NSTEMI-ACS before and after the introduction of the new care pathway. As with all observational studies it is open to residual bias and unknown confounding factors.

## INTRODUCTION

Acute coronary syndromes (ACS) encompass a spectrum of clinical presentations that include ST elevation myocardial infarction (STEMI), non-ST elevation myocardial infarction (NSTEMI), and unstable angina (UA). In recent years, patients who present with STEMI have benefited from a shift from thrombolytic therapy to primary percutaneous coronary intervention (PCI) (1, 2). The latest Myocardial Ischaemia National Audit Project (MINAP) data demonstrates that this change in practice has been implemented remarkably quickly across most parts of the UK so that the majority of patients with STEMI are now treated with primary PCI (3). Targets supported by the Health Care Commission based on time from symptom onset to opening of the infarct-related artery set a standard against which models of care for patients with STEMI are measured and these targets have driven reductions in treatment times and improved clinical outcomes (3).

Non ST elevation ACS (NSTEMI-ACS) accounts for a far greater proportion of ACS admissions than STEMI each year (3). NSTEMI-ACS is considered a 'high-risk' clinical condition, associated with one-year mortality rates greater than or equal to those seen after STEMI (4). International treatment guidelines recommend that patients with NSTEMI-ACS are managed with immediate medical therapy followed by early coronary angiography (and PCI if appropriate) within 72-96 hours of hospital admission (5), and within 24 hours for the highest risk patients (5). Despite these guidelines recommending early invasive management of patients with NSTEMI-ACS, standard care pathways rarely achieve these evidence-based treatment timeframes.

The delivery of care for patients with NSTEMI-ACS has changed little in the last 10 years. Most patients with NSTEMI-ACS present to a hospital without a cardiac catheter laboratory where

1  
2  
3 they wait for transfer to the regional interventional cardiac centre for coronary angiography  
4  
5 (6). This model of care results in unacceptable delays to treatment (7) which are detrimental  
6  
7 to patient outcomes and which waste healthcare resources. A systematic approach to early  
8  
9 diagnosis, risk stratification and 'direct' transfer to an interventional cardiac centre has the  
10  
11 potential to minimise unnecessary delays for coronary angiography, to reduce hospital stays,  
12  
13 and to prevent recurrent ischaemic cardiac events in higher risk patients.  
14  
15

16  
17  
18 The London Chest Hospital is a regional interventional cardiac centre serving a population of  
19  
20 approximately 1.8 million in North East London. The hospital provides coronary  
21  
22 angiography, PCI, and cardiac surgery for six district general hospitals (DGH) in the region.  
23  
24 Here we have devised a new clinical pathway for the management of patients with NTEACS  
25  
26 that built upon our experience from developing a network-wide STEMI service. This new  
27  
28 pathway known locally as the Heart Attack Centre Extension or 'HAC-X' service aims to  
29  
30 transfer those patients with NSTEMI-ACS who can be diagnosed within four hours of  
31  
32 presentation directly from the Emergency Department to the regional interventional cardiac  
33  
34 centre avoiding unnecessary admission to the local hospital.  
35  
36  
37  
38  
39

40  
41 This article represents a prospective study that monitored the implementation of this novel  
42  
43 clinical HAC-X pathway for the management of patients with NSTEMI-ACS. The aim of the  
44  
45 HAC-X pathway was to facilitate the early invasive management of patients with NSTEMI-  
46  
47 ACS. Potentially this streamlined approach to NSTEMI-ACS management would represent a  
48  
49 more efficient use of NHS resources.  
50  
51  
52  
53  
54  
55  
56  
57  
58  
59  
60

## METHODS

We have undertaken a prospective observational study of the management of patients with NSTEMI-ACS treated at our institution between October 2009 and October 2010. This study period represents the last six months of our previous NSTEMI-ACS care model and the first six months of the new HAC-X pathway.

**Study population:** Patients were eligible for inclusion in this study if they presented to a DGH Emergency Department participating in the HAC-X project and were subsequently transferred to our institution for further management.

Inclusion criteria for the HAC-X clinical pathway (Table 1) and therefore study inclusion criteria were an admission diagnosis of NSTEMI-ACS with chest pain within 24 hours of presentation plus either an elevated blood troponin T or troponin I concentration, or electrocardiographic changes compatible with ischaemia (defined as ST-segment depression  $\geq 1$  mm or T-wave inversion  $\geq 2$  mm in two contiguous leads, or biphasic ST/T wave segments indicative of a critical stenosis in the left anterior descending artery). Patients were excluded if they had a contraindication to early interventional management including major medical comorbidity, unexplained anaemia (haemoglobin concentration  $< 10$  g/dL), acute renal failure, recent traumatic injury or loss of consciousness (except when secondary to cardiac arrhythmia), overt sepsis, or unexplained hypoxia.

During the twelve-month study period, 702 patients with NSTEMI-ACS were treated at our institution. These patients were divided into two groups for subsequent analysis; 391 patients treated before the instigation of the HAC-X pathway (pre-HAC-X), and 311 patients treated via the novel pathway (post-HAC-X).

1  
2  
3  
4  
5 **Study protocol:** The London Chest Hospital is a ‘stand-alone’ regional interventional cardiac  
6  
7 centre. It has no onsite emergency department and only patients with suspected ST elevation  
8  
9 myocardial infarction are admitted directly to the hospital. All patients with suspected NSTEMI-  
10  
11 ACS must first be seen at a DGH before transfer.  
12  
13

14  
15  
16 During the first six months of the study period (pre-HAC-X) the model of care for patients  
17  
18 with NSTEMI-ACS involved admission to their local DGH for ‘medical stabilisation’ pending  
19  
20 availability of a bed at the regional interventional cardiac centre for transfer for coronary  
21  
22 angiography (and/or PCI). Clinical instability prompted more urgent transfer and patients  
23  
24 were usually transferred back to their local hospital for discharge following invasive cardiac  
25  
26 treatment.  
27  
28

29  
30  
31 After the initiation of the HAC-X pathway in April 2010 (post HAC-X) patients diagnosed  
32  
33 with NSTEMI-ACS in the DGH Emergency Department, and meeting the inclusion criteria for  
34  
35 the HAC-X pathway (Table 1) received protocol driven evidence based medical therapy  
36  
37 (Table 2) and were transferred to our institution directly within 1 hour of diagnosis. There  
38  
39 was no requirement for ECG review or prior notification of the patient’s transfer to our centre  
40  
41 but clinical advice could be sought in cases of diagnostic uncertainty. If the admission  
42  
43 diagnosis of NSTEMI-ACS was confirmed at our centre, coronary angiography was performed;  
44  
45 unstable patients were taken directly for coronary angiography. Stable patients had coronary  
46  
47 angiography scheduled for later the same day, or if the patient arrived outside of standard  
48  
49 working hours, coronary angiography took place on the next available routine list. All  
50  
51 subsequent cardiac care was undertaken at the regional cardiac centre. We aimed to discharge  
52  
53 patients within 48 hours of their admission. Patients requiring surgical revascularisation  
54  
55  
56  
57  
58  
59  
60



1  
2  
3 remained at our centre until surgery was performed. Patients were not transferred back to  
4  
5 their DGH but managed solely at the regional cardiac centre after 'HAC-X transfer'.  
6  
7

8  
9  
10 **Outcome measures:** Our primary study endpoint was time to coronary angiography for  
11  
12 patients with NSTEMI-ACS (defined as the time of registration at the DGH Emergency  
13  
14 Department (ED) to beginning of the angiogram procedure). We also measured length of  
15  
16 hospital stay (defined as the time from registration at the DGH Emergency Department to  
17  
18 final hospital discharge). In addition, we have assessed the need for angiography and/or  
19  
20 coronary revascularization, along with discharge diagnosis of the post-HACX group.  
21  
22

23  
24  
25 **Statistical Analysis:** Continuous data with a normal distribution are reported as mean  $\pm$   
26  
27 standard deviation. Skewed data are reported as median and interquartile range. Categorical  
28  
29 data are expressed as percentages. Continuous variables with a normal distribution were  
30  
31 compared by Student's *t*-test. Skewed data were compared using the Mann-Whitney U test.  
32  
33 Categorical variables were compared by the Chi Square or Fisher exact test. Statistical  
34  
35 significance was defined as  $p < 0.05$ . Statistical analyses were performed using SPSS version  
36  
37 18.0 (SPSS Inc, Chicago, IL, USA).  
38  
39

40  
41  
42 **Ethical Considerations:** As the data collected was part of a national cardiac audit project  
43  
44 and all patient identifiers removed prior to data analysis our local ethics committee advised  
45  
46 that formal ethical approval was not required to undertake this study.  
47  
48  
49  
50  
51  
52  
53  
54  
55  
56  
57  
58  
59  
60

## RESULTS

**Patient characteristics** (Table 3): In total of 702 patients with NSTEMI-ACS were treated at our institution during the study period. 391 (55.7%) patients were treated in the six months pre-HAC-X, and 311 (44.3%) patients were treated in the six months post-HAC-X.

Patients in the post-HAC-X group were younger (57.0 vs 65.2 years;  $p<0.001$ ) and were more likely to be or have been smokers (58.8% vs 48.6%;  $p=0.009$ ). Hypercholesterolaemia (51.3% vs 46.0%;  $p<0.001$ ), peripheral vascular disease (6.0% vs 1.5%;  $p=0.003$ ) and previous PCI (25.55 vs 14.1%;  $p<0.001$ ) were also observed more frequently in the post-HAC-X group.

**Outcome of invasive investigation** (Figure 1): Pre-HAC-X patients had the diagnosis of NSTEMI-ACS confirmed by a local cardiologist prior to transfer. Therefore all of these patients underwent coronary angiography. Of these, 212 (54.2%) patients subsequently underwent coronary revascularization; 144/212 (67.9%) patients underwent PCI and 68/212 (32.1%) patients were referred for coronary artery bypass graft (CABG) surgery. 179/391 (45.8%) patients did not receive either PCI or CABG, but had coronary disease requiring ongoing medical therapy.

Post HAC-X 250 of the 311 (80.4%) patients transferred to our centre by the new pathway underwent coronary angiography. Of these, 144/250 (57.6%) subsequently underwent coronary revascularization; 108/144 (75.0%) patients underwent PCI and 36/144 (25.0%) patients were referred for coronary artery bypass graft (CABG) surgery, and 106/250 (42.4%) patients were treated with medical therapy alone.

1  
2  
3 **Time to coronary angiography:** The initiation of the HAC-X pathway led to significant  
4 reductions in the median waiting time from DGH Emergency Department admission to  
5 coronary angiography for patients with NSTEMI-ACS. Pre-HAC-X time to angiography was 7.2  
6 (IQR 5.1 to 10.2) days; post-HAC-X this had reduced to 1.0 (IQR 0.7 to 2.0) days ( $p<0.001$ )  
7 (Figure 2). Pre HAC-X only 18% of patients with NSTEMI-ACS underwent coronary  
8 angiography within the recommended 96-hours from presentation. Post HAC-X 90% of  
9 patients underwent coronary angiography within this timeframe (Figure 3).  
10  
11  
12  
13  
14  
15  
16  
17  
18  
19

20  
21 **Length of Hospital Stay:** Median length of hospital stay reduced significantly from 9.0 (IQR  
22 6.0 to 14.0) days pre-HAC-X to 3.0 (IQR 2.0 to 6.0) days post-HAC-X ( $p<0.001$ ). This  
23 equates to a saving of 6 hospital bed days per NSTEMI-ACS admission. As 311 patients with  
24 NSTEMI-ACS were treated according the HAC-X pathway during its first 6 months of  
25 operation we estimated that 1866 hospital bed days were saved during this period.  
26  
27  
28  
29  
30  
31  
32  
33

34 **Clinical efficacy of HAC-X pathway:** 85.5% of patients admitted directly via the HAC-X  
35 pathway had a cardiological diagnosis. NSTEMI-ACS was the discharge diagnosis for 235  
36 (75.5%) of the 311 patients treated according to the HAC-X pathway. A further 31/311  
37 (10.0%) patients had another cardiac cause for chest pain (including pericarditis or  
38 myocarditis) whereas 45/311 (14.5%) of patients had a non-cardiac cause for their symptoms.  
39  
40  
41  
42  
43  
44  
45  
46  
47  
48  
49  
50  
51  
52  
53  
54  
55  
56  
57  
58  
59  
60

## DISCUSSION

The introduction of the HAC-X pathway led to a significant decrease in time from hospital admission to coronary angiography for patients with NSTEMI-ACS. Furthermore, the proportion of patients with NSTEMI-ACS treated within the 96-hour guideline target increased dramatically from 18% pre-HAC-X to 90% post-HAC-X. This novel clinical pathway facilitated the rapid, efficient management of NSTEMI-ACS patients, which has translated into a two-thirds reduction in length of hospital stay.

Direct transfer of patients from the DGH to the regional cardiac centre has proved a far more streamlined approach to NSTEMI-ACS care. Not only was the length of hospital stay decreased but all patients managed via the HAC-X pathway also avoided an unnecessary admission to their local DGH. The HAC-X pathway was only feasible because all parties involved (cardiac centre, DGHs, and local health care commission) were motivated to contribute to the project. The benefit of the HAC-X pathway to the referring DGH is immediately evident. Direct transfer of patients with NSTEMI-ACS results in a huge reduction in 'wasted' hospital bed days. Furthermore, the HAC-X pathway has an additional cost benefit as it avoids local health care commissioners from having to fund 2 admission tariffs for the same index event. Prior to the initiation of the HAC-X the local health care commission was paying admission tariffs to both the DGH, and the regional cardiac centre. However, the HAC-X service did require the cardiac center to invest in more bed capacity that inevitably increased the cost of the pathway to the cardiac center.

The success of this pathway, which aims to transfer patients to a specialist centre without admission to the local hospital is critically dependent upon an accurate early diagnosis both for obvious clinical reasons and, in the UK, to facilitate transfer out of the Emergency

1  
2  
3 Department within the four hour target. Patients with NSTEMI-ACS form a heterogenous group  
4  
5 yet the simple inclusion criteria for the HAC-X pathway of clinical symptoms of ACS plus  
6  
7 either a positive point of care troponin assay or electrocardiographic changes consistent with  
8  
9 myocardial ischaemia enabled an accurate diagnosis to be made in more than three-quarters  
10  
11 of patients. This is comparable with diagnostic accuracy rates for patients delivered to Heart  
12  
13 Attack Centres for acute STEMI management.  
14  
15

16  
17  
18 The inclusion criteria for the pre-HAC-X and post-HAC-X cohorts are subtly different. Pre-  
19  
20 HAC-X, patients with suspected NSTEMI-ACS were admitted to the DGH for medical  
21  
22 stabilization and cardiology review. If a local cardiologist confirmed the diagnosis of NSTEMI-  
23  
24 ACS then the patients were transferred to the interventional cardiac centre for invasive  
25  
26 investigation and management. Thus the pre-HAC-X cohort consisted only of patients with  
27  
28 confirmed NSTEMI-ACS undergoing coronary angiography. The post HAC-X cohort consisted  
29  
30 of patients with suspected NSTEMI-ACS transferred directly from the Emergency Department  
31  
32 to the interventional cardiac centre. The diagnosis of NSTEMI-ACS was not confirmed until  
33  
34 cardiology review at the cardiac centre, and inevitably the post-HAC-X cohort contained  
35  
36 some patients who proved to have an alternate diagnosis and did not undergo coronary  
37  
38 angiography.  
39  
40  
41  
42  
43  
44

45 Patients with a final non-cardiac diagnosis comprised about 15% of post-HAC-X patients.  
46  
47 This group incorporated both patients who failed to meet the pathway's inclusion criteria who  
48  
49 were transferred inappropriately and patients who had chest pain with an abnormal ECG but  
50  
51 who were subsequently shown to have a negative troponin measured 12 hours after onset of  
52  
53 symptoms. In patients with myocarditis or pericarditis, myocardial infarction was suspected  
54  
55 at presentation, but the rapid access to coronary angiography and early demonstration of  
56  
57  
58  
59  
60

1  
2  
3 unobstructed coronary arteries allowed other cardiac diagnoses to be considered. The  
4 majority of these patients were discharged quickly from the cardiac centre,  
5  
6  
7

8  
9  
10 The proportion of patients undergoing coronary revascularization post-HAC-X is in line with  
11 contemporary observational data of NSTEMI-ACS management (8). It is also similar to our  
12 historical revascularization rates for patients with NSTEMI-ACS. Therefore, diagnostic criteria  
13 for the HAC-X pathway appear to perform as well the traditional model of care in their  
14 ability to identify patients with NSTEMI-ACS who will benefit from revascularization.  
15  
16 Importantly these diagnostic criteria identify these patients more quickly. This is key to the  
17 success of a model that aims to transfer patients direct from the Emergency Department to the  
18 cardiac centre in a systematic way.  
19  
20  
21  
22  
23  
24  
25  
26  
27

28  
29 It should be noted that direct comparison of pre-HAC-X and post-HAC-X patients is  
30 problematic. There are important differences in the baseline demographics between the  
31 patient cohorts (Table 2). Post-HAC-X patients were younger, more likely to be current  
32 smokers and more commonly had a history of hypercholesterolaemia, previous PCI and  
33 peripheral vascular disease. There are several potential explanations for these differences in  
34 cohort demographics. Firstly, the presence of coronary risk factors or a history of previous  
35 PCI in patients presenting to the emergency department with chest pain is likely to stimulate  
36 early cardiac investigations. Inclusion criteria for the HAC-X pathway were diagnosis of  
37 NSTEMI-ACS whilst in the Emergency Department. Older patients with a paucity of coronary  
38 risk factors and no previous cardiac history may have had a delayed NSTEMI-ACS diagnosis  
39 meaning they could not be transferred directly from the Emergency Department via the HAC-  
40 X pathway. Secondly, patients with major medical comorbidities that precluded early  
41 angiography were specifically excluded from the HAC-X pathway. This is likely to introduce  
42  
43  
44  
45  
46  
47  
48  
49  
50  
51  
52  
53  
54  
55  
56  
57  
58  
59  
60

1  
2  
3 a degree of selection bias within the cohorts. The post-HAC-X cohort was generally younger  
4 and fitter, and this may have facilitated early discharge and a reduced length of hospital stay.  
5  
6  
7 Importantly, NSTEMI-ACS patients with exclusions to the HAC-X pathway who were clinically  
8  
9  
10 unstable were always transferred to the interventional centre for further management,  
11  
12 although these patients are not represented in this study.

13  
14  
15  
16 **Limitations of study:** Point of care troponin testing was not available in the emergency  
17  
18 departments until the initiation of the HAC-X pathway. Thus pre-HAC-X, patients will have  
19  
20 undergone laboratory troponin testing whereas post-HAC-X patients underwent point of care  
21  
22 troponin testing. These troponin assays, have differing sensitivity and specificities; for  
23  
24 example point of care assays are designed to be highly sensitive, but may lack specificity  
25  
26 compared with standard laboratory assays(9). This may predispose to the inclusion of patients  
27  
28 with presumed NSTEMI-ACS who subsequently receive a non-cardiac diagnosis. Despite this  
29  
30 limitation inappropriate transfers via the HAC-X pathway were infrequent. The HAC-X  
31  
32 clinical pathway was designed to identify patients with NSTEMI-ACS whilst they remained in  
33  
34 the Emergency Department. There are patients with suspected NSTEMI-ACS with an initially  
35  
36 normal ECG and negative point of care troponin, that develop ECG abnormalities or a  
37  
38 positive troponin assay later in their hospital admission. Thus some patients with NSTEMI-ACS  
39  
40 continued to be admitted to the DGH even after the initiation of the HAC-X pathway.  
41  
42 NSTEMI-ACS patients admitted to the DGH, in the post-HAC-X era were managed in a similar  
43  
44 fashion to pre-HAC-X patients, with medical stabilization and transfer to the interventional  
45  
46 centre once a bed became available. We have not collected data upon this small group of  
47  
48 patients. We can only speculate as to how the inclusion of these patients may have affected  
49  
50 our results.  
51  
52  
53  
54  
55  
56  
57  
58  
59  
60

1  
2  
3 Two of the six DGH's served by the London Chest Hospital have on-site catheterization  
4 laboratories offering diagnostic cardiac catheterization only and not PCI. Potentially, a small  
5 number of patients with suspected NSTEMI-ACS could have undergone diagnostic  
6 catheterization locally and then either been discharged or if no coronary revascularization  
7 was indicated referred directly for coronary surgery. As patient data for this study was  
8 collected only after referral for coronary angiography and/or PCI at the interventional centre  
9 these patients with NSTEMI-ACS bypassed study enrollment and thus are not represented  
10 within the study cohort. However, we believe that the standardized transfer criteria for  
11 NSTEMI-ACS patients that was central to the HAC-X pathway would make DGH admission  
12 and local angiography for NSTEMI-ACS patients less common in the post-HAC-X period'.  
13  
14  
15  
16  
17  
18  
19  
20  
21  
22  
23  
24  
25  
26  
27  
28  
29  
30  
31  
32  
33  
34  
35  
36  
37  
38  
39  
40  
41  
42  
43  
44  
45  
46  
47  
48  
49  
50  
51  
52  
53  
54  
55  
56  
57  
58  
59  
60



## THE FUTURE

Delivery of coronary angiography within 96 hours for NSTEMI-ACS patients admitted to hospitals without facilities for invasive cardiac investigations is challenging. The HAC-X pathway is effective in identifying patients with NSTEMI-ACS for transfer directly to the regional cardiac centre avoiding unnecessary delays in treatment. Use of this model modified according to local circumstances could be applied nationally to streamline the management of NSTEMI-ACS patients. The investment required for 'HAC-X' beds would be more than offset by the resulting savings in hospital bed days.

## CONCLUSION

The introduction of this novel care pathway was associated with significant reductions in time to angiography and in total hospital bed occupancy for patients with NSTEMI-ACS. We have demonstrated its feasibility in routine clinical practice so this model could be used more widely to streamline the management of NSTEMI-ACS patients.

**Footnotes**

**Funding:** There was no funding for this study

**Contributions:** SG and AJ conceived and designed the study. SG, MJL, DAJ, EF, SC, ZB and RAA acquired the data. SG, MJL, DAJ, and AJ analysed and interpreted the data. SG and MJL carried out statistical analysis. SG, MJL, RAA, AW and AJ drafted the original manuscript. SG, MJL, DAJ, AW, SC, EJS, RAA, CK, AM, MTR and AJ critically revised the manuscript for important intellectual content.

**Conflicts of interests:** None of the authors of this manuscript have any conflicts of interest to declare.

**Data Sharing Statement:** No additional data available.

## References

1. Keeley EC, Boura JA, Grines CL. Primary angioplasty versus intravenous thrombolytic therapy for acute myocardial infarction: a quantitative review of 23 randomised trials. *Lancet*. 2003;361:13-20.
2. Van de Werf F, Bax J, Betriu A, Blomstrom-Lundqvist C, Crea F, Falk V, Filippatos G, Fox K, Huber K, Kastrati A, Rosengren A, Steg PG, Tubaro M, Verheugt F, Weidinger F, Weis M. Management of acute myocardial infarction in patients presenting with persistent ST-segment elevation: the Task Force on the Management of ST-Segment Elevation Acute Myocardial Infarction of the European Society of Cardiology. *Eur Heart J*. 2008;29:2909-2945.
3. Myocardial Ischaemia National Audit Project: How the NHS cares for patients with heart attack. 2010; London:
4. Allen LA, O'Donnell CJ, Camargo CAJ, Giugliano RP, Lloyd-Jones DM. Comparison of long-term mortality across the spectrum of acute coronary syndromes. *Am Heart J*. 2006;151:1065-1071.
5. Hamm CW, Bassand JP, Agewall S, Bax J, Boersma E, Bueno H, Caso P, Dudek D, Gielen S, Huber K, Ohman M, Petrie MC, Sonntag F, Uva MS, Storey RF, Wijns W, Zahger D, Bax JJ, Auricchio A, Baumgartner H, Ceconi C, Dean V, Deaton C, Fagard R, Funck-Brentano C, Hasdai D, Hoes A, Knuuti J, Kolh P, McDonagh T, Moulin C, Poldermans D, Popescu BA, Reiner Z, Sechtem U, Sirnes PA, Torbicki A, Vahanian A, Windecker S, Windecker S, Achenbach S, Badimon L, Bertrand M, Botker HE, Collet JP, Crea F, Danchin N, Falk E, Goudevenos J, Gulba D, Hambrecht R, Herrmann J, Kastrati A, Kjeldsen K, Kristensen SD, Lancellotti P, Mehilli J, Merkely B, Montalescot G, Neumann FJ, Neyses L, Perk J, Roffi M, Romeo F, Ruda M, Swahn E, Valgimigli M, Vrints CJ, Widimsky P. ESC

1  
2  
3 Guidelines for the management of acute coronary syndromes in patients presenting without  
4  
5 persistent ST-segment elevation: The Task Force for the management of acute coronary  
6  
7 syndromes (ACS) in patients presenting without persistent ST-segment elevation of the  
8  
9 European Society of Cardiology (ESC). *Eur Heart J*. 2011;32:2999-3054.  
10

11  
12 6. Bellenger NG, Eichhofer J, Crone D, Curzen N. Hospital stay in patients with non-ST-  
13  
14 elevation acute coronary syndromes. *Lancet*. 2004;363:1399-1400.  
15

16  
17  
18 7. National Interhospital Transfer Audit. 2004; 2004.  
19

20  
21 8. Zia MI, Goodman SG, Peterson ED, Mulgund J, Chen AY, Langer A, Tan M, Ohman EM,  
22  
23 Gibler WB, Pollack CVJ, Roe MT. Paradoxical use of invasive cardiac procedures for  
24  
25 patients with non-ST segment elevation myocardial infarction: an international perspective  
26  
27 from the CRUSADE Initiative and the Canadian ACS Registries I and II. *Can J Cardiol*.  
28  
29 2007;23:1073-1079.  
30

31  
32  
33 9. Bock JL, Singer AJ, Thode HCJ. Comparison of emergency department patient  
34  
35 classification by point-of-care and central laboratory methods for cardiac troponin I. *Am J*  
36  
37 *Clin Pathol*. 2008;130:132-135.  
38  
39  
40  
41  
42  
43  
44  
45  
46  
47  
48  
49  
50  
51  
52  
53  
54  
55  
56  
57  
58  
59  
60

1  
2  
3  
4  
5  
6  
7  
8  
9  
10  
11  
12  
13  
14  
15  
16  
17  
18  
19  
20  
21  
22  
23  
24  
25  
26  
27  
28  
29  
30  
31  
32  
33  
34  
35  
36  
37  
38  
39  
40  
41  
42  
43  
44  
45  
46  
47  
48  
49  
50  
51  
52  
53  
54  
55  
56  
57  
58  
59  
60

For peer review only

Table 1. Inclusion and Exclusion Criteria for HAC-X clinical pathway

|                           |                                                                                                                                                                                            |
|---------------------------|--------------------------------------------------------------------------------------------------------------------------------------------------------------------------------------------|
| <b>Inclusion criteria</b> | <b>Symptoms suggestive of myocardial ischaemia</b><br>With a positive troponin assay<br>OR ECG changes including:<br>ST depression;<br>T wave inversion in V1-4;<br>Dynamic T wave changes |
| <b>Exclusion criteria</b> | Unexplained anaemia (Hb <10 g/dL)<br>Hypoxia<br>Acute renal failure<br>Loss of consciousness(unless secondary to cardiac arrhythmia)<br>Recent trauma<br>Overt sepsis                      |

1  
2  
3 **Table 2. Evidence based immediate medical therapy for patients with NSTEMI treated**  
4 **via the HAC-X clinical pathway**  
5

6 Immediate evidence based therapy given at DGH included,  
7

8 Aspirin 300mg

9 Clopidogrel 600 mg

10 Fondaparinux 2.5 mg

11 Eptifibatide bolus (180 mg/kg) as long as no contraindications  
12  
13  
14  
15  
16  
17  
18  
19  
20  
21  
22  
23  
24  
25  
26  
27  
28  
29  
30  
31  
32  
33  
34  
35  
36  
37  
38  
39  
40  
41  
42  
43  
44  
45  
46  
47  
48  
49  
50  
51  
52  
53  
54  
55  
56  
57  
58  
59  
60

**Table 3. Clinical Characteristics of the study cohort**

| Variables                                 | Pre-HAC-X<br>n=391 | Post-HAC-X<br>n=311 | p value |
|-------------------------------------------|--------------------|---------------------|---------|
| <b>Age (years)</b>                        | 65.2 +/-12.6       | 57.0 +/-13.9        | <0.001  |
| <b>Gender:</b>                            |                    |                     | 0.884   |
| Male (%)                                  | 70.8               | 70.0                |         |
| Female (%)                                | 29.2               | 30.0                |         |
| <b>Smoking status:</b>                    |                    |                     | 0.009   |
| Current (%)                               | 18.2               | 29.6                |         |
| Ex-smoker (%)                             | 30.4               | 31.9                |         |
| Never (%)                                 | 51.4               | 41.2                |         |
| <b>Diabetes:</b>                          |                    |                     | 0.205   |
| Insulin requiring (%)                     | 6.1                | 9.7                 |         |
| Non-Insulin requiring(%)                  | 24.8               | 22.6                |         |
| Not diabetic (%)                          | 69.1               | 67.7                |         |
| <b>Hypertension (%)</b>                   | 62.7               | 59.7                | 0.241   |
| <b>Hypercholesterolaemia (%)</b>          | 46.0               | 51.3                | 0.001   |
| <b>Previous myocardial infarction (%)</b> | 30.7               | 34.9                | 0.29    |
| <b>Previous PCI (%)</b>                   | 14.1               | 25.5                | <0.001  |
| <b>Previous CABG (%)</b>                  | 11.5               | 11.2                | 0.994   |
| <b>Peripheral vascular disease (%)</b>    | 1.5                | 6.0                 | 0.003   |
| <b>Previous stroke (%)</b>                | 6.7                | 8.1                 | 0.58    |



## Figure Legends

**Figure 1.** Flow diagram of patients with suspected ACS treated before (Pre-HAC-X) and after (Post-HAC-X) the initiation of the HAC-X clinical pathway describing access to coronary angiography and subsequent management strategy

**Figure 2.** Beeswarm boxplot demonstrating the time the ED admission to coronary angiography for patients with suspected ACS treated before (Pre-HAC-X) and after (Post-HAC-X) the initiation of the HAC-X clinical pathway. Each point represents the time taken to undergo coronary angiography for an individual patient.

**Figure 3.** The proportion of patients with suspected ACS undergoing coronary angiography within recommended 96 hours of hospital admission before (Pre-HAC-X) and after (Post-HAC-X) the initiation of the HAC-X clinical pathway.

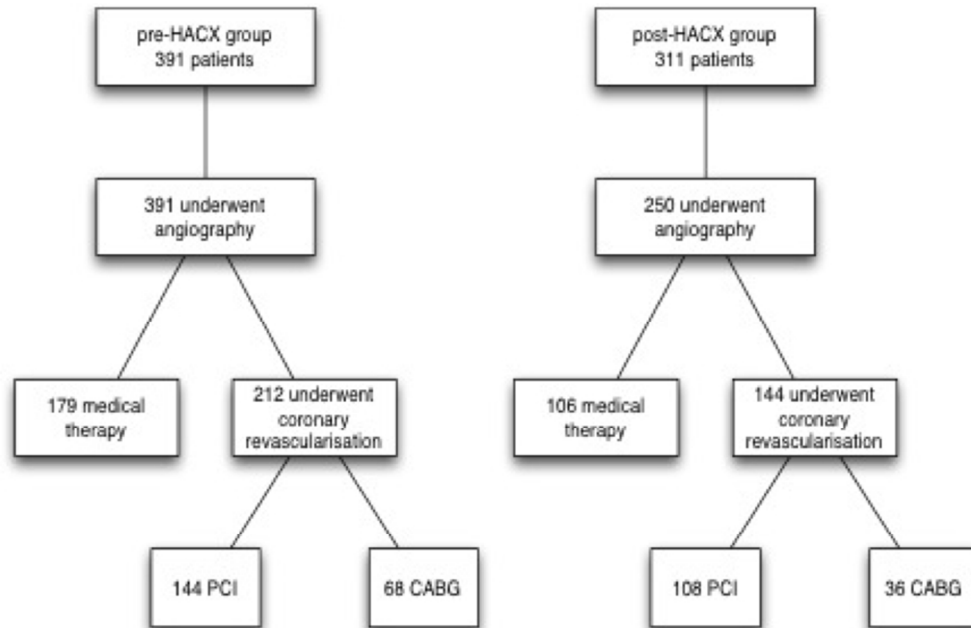

Figure 1. Flow diagram of patients with suspected ACS treated before (Pre-HAC-X) and after (Post-HAC-X) the initiation of the HAC-X clinical pathway describing access to coronary angiography and subsequent management strategy

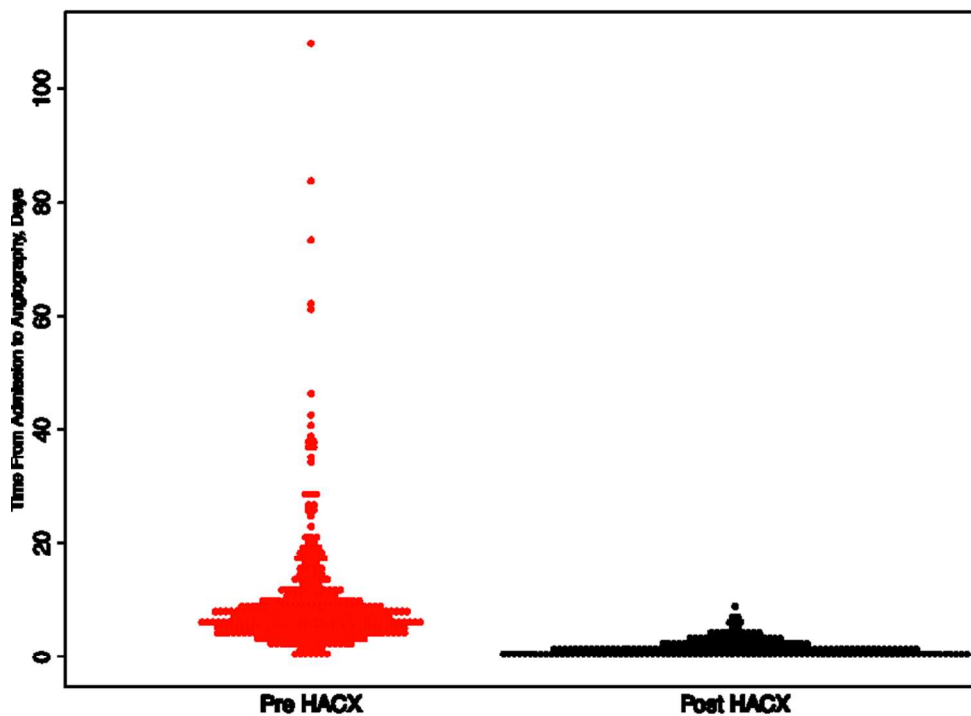

Figure 2. Beeswarm boxplot demonstrating the time the ED admission to coronary angiography for patients with suspected ACS treated before (Pre-HAC-X) and after (Post-HAC-X) the initiation of the HAC-X clinical pathway. Each point represents the time taken to undergo coronary angiography for an individual patient.

For peer review only

1  
2  
3  
4  
5  
6  
7  
8  
9  
10  
11  
12  
13  
14  
15  
16  
17  
18  
19  
20  
21  
22  
23  
24  
25  
26  
27  
28  
29  
30  
31  
32  
33  
34  
35  
36  
37  
38  
39  
40  
41  
42  
43  
44  
45  
46  
47  
48  
49  
50  
51  
52  
53  
54  
55  
56  
57  
58  
59  
60

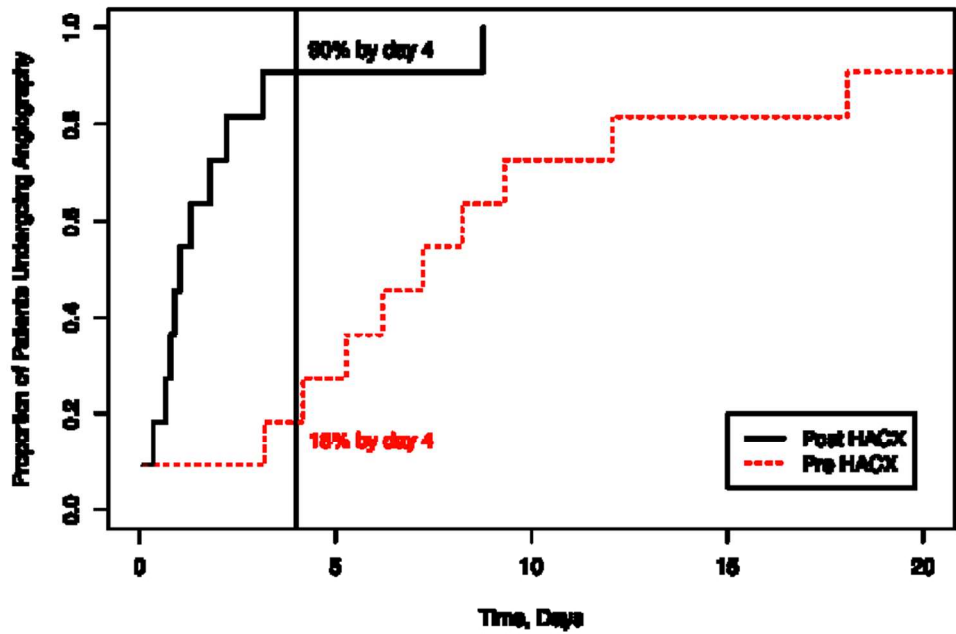

Figure 3. The proportion of patients with suspected ACS undergoing coronary angiography within recommended 96 hours of hospital admission before (Pre-HAC-X) and after (Post-HAC-X) the initiation of the HAC-X clinical pathway.

ew only

# BMJ Open

## DOES A "DIRECT" TRANSFER PROTOCOL REDUCE TIME TO CORONARY ANGIOGRAPHY FOR PATIENTS WITH NON ST-ELEVATION ACUTE CORONARY SYNDROMES?: A PROSPECTIVE OBSERVATIONAL STUDY.

|                                 |                                                                                                                                                                                                                                                                                                                                                                                                                                                                                                                                                                                                                                                                                                                                                                                            |
|---------------------------------|--------------------------------------------------------------------------------------------------------------------------------------------------------------------------------------------------------------------------------------------------------------------------------------------------------------------------------------------------------------------------------------------------------------------------------------------------------------------------------------------------------------------------------------------------------------------------------------------------------------------------------------------------------------------------------------------------------------------------------------------------------------------------------------------|
| Journal:                        | <i>BMJ Open</i>                                                                                                                                                                                                                                                                                                                                                                                                                                                                                                                                                                                                                                                                                                                                                                            |
| Manuscript ID:                  | bmjopen-2014-005525                                                                                                                                                                                                                                                                                                                                                                                                                                                                                                                                                                                                                                                                                                                                                                        |
| Article Type:                   | Research                                                                                                                                                                                                                                                                                                                                                                                                                                                                                                                                                                                                                                                                                                                                                                                   |
| Date Submitted by the Author:   | 21-Apr-2014                                                                                                                                                                                                                                                                                                                                                                                                                                                                                                                                                                                                                                                                                                                                                                                |
| Complete List of Authors:       | Gallagher, Sean; Barts Health NHS Trust, Cardiology<br>Lovell, Matthew; Bartshealth NHS Trust, Cardiology<br>Jones, Dan; Bartshealth NHS Trust, Cardiology<br>Ferguson, Eileen; Bartshealth NHS Trust, Cardiology<br>Akhtar, Abid; Bartshealth NHS Trust, Cardiology<br>Buckhoree, Zia; Barts and the London NHS Trust, Cardiology<br>Wragg, Andrew; Bartshealth NHS Trust, Cardiology<br>Knight, Charles; Bartshealth NHS Trust, Cardiology<br>Mathur, Anthony; Barts Health NHS Trust, Cardiology<br>Smith, Elliot; Bartshealth NHS Trust, Cardiology<br>Cliffe, Samantha; Bartshealth NHS Trust, Cardiology<br>Archbold, Andrew; Bartshealth NHS Trust, Cardiology<br>Rothman, Martin; Bartshealth NHS Trust, Cardiology<br>Jain, Ajay; Bartshealth NHS Trust, Department of Cardiology |
| <b>Primary Subject Heading</b>: | Cardiovascular medicine                                                                                                                                                                                                                                                                                                                                                                                                                                                                                                                                                                                                                                                                                                                                                                    |
| Secondary Subject Heading:      | Cardiovascular medicine                                                                                                                                                                                                                                                                                                                                                                                                                                                                                                                                                                                                                                                                                                                                                                    |
| Keywords:                       | Ischaemic heart disease < CARDIOLOGY, Myocardial infarction < CARDIOLOGY, HEALTH ECONOMICS                                                                                                                                                                                                                                                                                                                                                                                                                                                                                                                                                                                                                                                                                                 |
|                                 |                                                                                                                                                                                                                                                                                                                                                                                                                                                                                                                                                                                                                                                                                                                                                                                            |

SCHOLARONE™  
Manuscripts

1  
2  
3 **DOES A “DIRECT” TRANSFER PROTOCOL REDUCE TIME TO CORONARY ANGIOGRAPHY**  
4 **FOR PATIENTS WITH NON ST-ELEVATION ACUTE CORONARY SYNDROMES?: A**  
5 **PROSPECTIVE OBSERVATIONAL STUDY.**  
6  
7

8  
9 Gallagher SM <sup>1,2,3</sup>, Lovell MJ <sup>1</sup>, Jones DA <sup>1,2,4</sup>, Ferguson E <sup>1</sup>, Ahktar A <sup>1</sup>, Buckhoree Z <sup>1</sup>, Wragg A <sup>1,2</sup>,  
10 Knight CJ <sup>1,2</sup>, Mathur A <sup>1,2,4</sup>, Smith EJ <sup>1,2</sup>, Cliffe S <sup>1</sup>, Archbold RA <sup>1,2</sup>, Rothman MT <sup>1</sup> and Jain AK <sup>1,2</sup>  
11

12  
13  
14 <sup>1</sup> Department of Cardiology, Barts Health NHS Trust

15  
16 <sup>2</sup> NIHR Cardiovascular Biomedical Research Unit, London Chest Hospital, London

17  
18 <sup>3</sup> Department of Translational Medicine and Therapeutics, William Harvey Research, Queen Mary College,  
19 London

20  
21 <sup>4</sup> Department of Clinical Pharmacology, William Harvey Research Institute, Queen Mary College, London  
22  
23  
24  
25  
26  
27

28 Corresponding address:

29 Dr AK Jain

30 Department of Cardiology,

31 London Chest Hospital,

32 Bonner Road,

33 London,

34 E2 9JX

35  
36  
37  
38  
39  
40 Phone number: 020 898 32248

41  
42 Email: [ajay.jain@bartshealth.nhs.uk](mailto:ajay.jain@bartshealth.nhs.uk)  
43  
44  
45  
46  
47  
48  
49  
50  
51  
52  
53  
54  
55  
56  
57  
58  
59  
60

## Abstract

**Objective:** National guidelines recommend 'early' coronary angiography within 96 h of presentation for patients with non-ST elevation acute coronary syndromes (NSTEMI-ACS). Most patients with NSTEMI-ACS present to their district general hospital (DGH), and await transfer to the regional cardiac centre for angiography. This care model has inherent time delays, and delivery of timely angiography is problematic. The objective of this study was to assess a novel clinical care pathway for the management of NSTEMI-ACS, known locally as the Heart Attack Centre-Extension or HAC-X, designed to rapidly identify patients with NSTEMI-ACS while in DGH emergency departments (ED) and facilitate transfer to the regional interventional centre for 'early' coronary angiography.

**Methods:** This was an observational study of 702 patients divided into two groups; 391 patients treated before the instigation of the HAC-X pathway (Pre-HACX), and 311 patients treated via the novel pathway (Post-HACX). Our primary study end point was time from ED admission to coronary angiography. We also assessed the length of hospital stay.

**Results:** Median time from ED admission to coronary angiography was 7.2 (IQR 5.1 - 10.2) days pre-HAC-X compared to 1.0 (IQR 0.7 - 2.0) day post-HAC-X ( $p < 0.001$ ). Median length of hospital stay was 3.0 (IQR 2.0-6.0) days post-HAC-X v 9.0 (IQR 6.0-14.0) days pre-HAC-X ( $p < 0.0005$ ). This equates to a reduction of six hospital bed days per NSTEMI-ACS admission.

**Conclusions:** The introduction of this novel care pathway was associated with significant reductions in time to angiography and in total hospital bed occupancy for patients with NSTEMI-ACS.

## Article summary

### Article focus

This paper describes the effect of a novel care pathway for patients with NSTEMI-ACS upon waiting times for coronary angiography and total length of hospital stay when it was introduced at a large regional interventional cardiac centre in East London.

### Key messages

After the introduction of this novel care pathway,

1. Time from hospital admission to coronary angiography for patients with NSTEMI-ACS was reduced by 6 days.
2. Length of hospital admission for patients with NSTEMI-ACS was reduced by two-thirds.

The use of this model modified according to local circumstances could be applied nationally to streamline the management of NSTEMI-ACS patients.

### Strengths and limitations of this paper

This paper describes the introduction of the first clinical pathway of its type in UK. Logistical delays in delivering early angiography for patients with NSTEMI-ACS remains a problem, thus our real-world data demonstrating a streamlined care pathway for these high-risk patients is extremely relevant.

This is not randomized data. The paper describes management of patients with NSTEMI-ACS before and after the introduction of the new care pathway. As with all observational studies it is open to residual bias and unknown confounding factors.



## INTRODUCTION

Acute coronary syndromes (ACS) encompass a spectrum of clinical presentations that include ST elevation myocardial infarction (STEMI), non-ST elevation myocardial infarction (NSTEMI), and unstable angina (UA). In recent years, patients who present with STEMI have benefited from a shift from thrombolytic therapy to primary percutaneous coronary intervention (PCI) [1, 2]. The latest Myocardial Ischaemia National Audit Project (MINAP) data demonstrates that this change in practice has been implemented remarkably quickly across most parts of the UK so that the majority of patients with STEMI are now treated with primary PCI [3]. Targets supported by the Health Care Commission based on time from symptom onset to opening of the infarct-related artery set a standard against which models of care for patients with STEMI are measured and these targets have driven reductions in treatment times and improved clinical outcomes [3].

Non ST elevation ACS (NSTEMI-ACS) accounts for a far greater proportion of ACS admissions than STEMI each year [3]. NSTEMI-ACS is considered a 'high-risk' clinical condition, associated with one-year mortality rates greater than or equal to those seen after STEMI [4]. International treatment guidelines recommend that patients with NSTEMI-ACS are managed with immediate medical therapy followed by early coronary angiography (and PCI if appropriate) within 72-96 hours of hospital admission [5], and within 24 hours for the highest risk patients [5]. Despite these guidelines recommending early invasive management of patients with NSTEMI-ACS, standard care pathways rarely achieve these evidence-based treatment timeframes.

The delivery of care for patients with NSTEMI-ACS has changed little in the last 10 years. Most patients with NSTEMI-ACS present to a hospital without a cardiac catheter laboratory where

1  
2  
3 they wait for transfer to the regional interventional cardiac centre for coronary angiography  
4  
5 [6]. This model of care results in unacceptable delays to treatment [7] which are detrimental  
6  
7 to patient outcomes and which waste healthcare resources. A systematic approach to early  
8  
9 diagnosis, risk stratification and 'direct' transfer to an interventional cardiac centre has the  
10  
11 potential to minimise unnecessary delays for coronary angiography, to reduce hospital stays,  
12  
13 and to prevent recurrent ischaemic cardiac events in higher risk patients.  
14  
15

16  
17  
18 The London Chest Hospital is a regional interventional cardiac centre serving a population of  
19  
20 approximately 1.8 million in North East London. The hospital provides coronary  
21  
22 angiography, PCI, and cardiac surgery for six district general hospitals (DGH) in the region.  
23  
24 Here we have devised a new clinical pathway for the management of patients with NTE-ACS  
25  
26 that built upon our experience from developing a network-wide STEMI service. This new  
27  
28 pathway known locally as the Heart Attack Centre Extension or 'HAC-X' service aims to  
29  
30 transfer those patients with NSTEMI-ACS who can be diagnosed within four hours of  
31  
32 presentation directly from the Emergency Department to the regional interventional cardiac  
33  
34 centre avoiding unnecessary admission to the local hospital.  
35  
36  
37  
38  
39

40  
41 This article represents a prospective study that monitored the implementation of this novel  
42  
43 clinical HAC-X pathway for the management of patients with NSTEMI-ACS. The aim of the  
44  
45 HAC-X pathway was to facilitate the early invasive management of patients with NSTEMI-  
46  
47 ACS. Potentially this streamlined approach to NSTEMI-ACS management would represent a  
48  
49 more efficient use of NHS resources.  
50  
51  
52  
53  
54  
55  
56  
57  
58  
59  
60

## METHODS

We have undertaken a prospective observational study of the management of patients with NSTEMI-ACS treated at our institution between October 2009 and October 2010. This study period represents the last six months of our previous NSTEMI-ACS care model and the first six months of the new HAC-X pathway.

**Study population:** Patients were eligible for inclusion in this study if they presented to a DGH Emergency Department participating in the HAC-X project and were subsequently transferred to our institution for further management.

Inclusion criteria for the HAC-X clinical pathway (Table 1) and therefore study inclusion criteria were an admission diagnosis of NSTEMI-ACS with chest pain within 24 hours of presentation plus either an elevated blood troponin T or troponin I concentration, or electrocardiographic changes compatible with ischaemia (defined as ST-segment depression  $\geq 1$  mm or T-wave inversion  $\geq 2$  mm in two contiguous leads, or biphasic ST/T wave segments indicative of a critical stenosis in the left anterior descending artery). Patients were excluded if they had a contraindication to early interventional management including major medical comorbidity, unexplained anaemia (haemoglobin concentration  $< 10$  g/dL), acute renal failure, recent traumatic injury or loss of consciousness (except when secondary to cardiac arrhythmia), overt sepsis, or unexplained hypoxia.

During the twelve-month study period, 702 patients with NSTEMI-ACS were treated at our institution. These patients were divided into two groups for subsequent analysis; 391 patients treated before the instigation of the HAC-X pathway (pre-HAC-X), and 311 patients treated via the novel pathway (post-HAC-X).

1  
2  
3  
4  
5 **Study protocol:** The London Chest Hospital is a ‘stand-alone’ regional interventional cardiac  
6  
7 centre. It has no onsite emergency department and only patients with suspected ST elevation  
8  
9 myocardial infarction are admitted directly to the hospital. All patients with suspected NSTEMI-  
10  
11 ACS must first be seen at a DGH before transfer.  
12  
13

14  
15  
16 During the first six months of the study period (pre-HAC-X) the model of care for patients  
17  
18 with NSTEMI-ACS involved admission to their local DGH for ‘medical stabilisation’ pending  
19  
20 availability of a bed at the regional interventional cardiac centre for transfer for coronary  
21  
22 angiography (and/or PCI). Clinical instability prompted more urgent transfer and patients  
23  
24 were usually transferred back to their local hospital for discharge following invasive cardiac  
25  
26 treatment.  
27  
28

29  
30  
31 After the initiation of the HAC-X pathway in April 2010 (post HAC-X) patients diagnosed  
32  
33 with NSTEMI-ACS in the DGH Emergency Department, and meeting the inclusion criteria for  
34  
35 the HAC-X pathway (Table 1) received protocol driven evidence based medical therapy  
36  
37 (Table 2) and were transferred to our institution directly within 1 hour of diagnosis. There  
38  
39 was no requirement for ECG review or prior notification of the patient’s transfer to our centre  
40  
41 but clinical advice could be sought in cases of diagnostic uncertainty. If the admission  
42  
43 diagnosis of NSTEMI-ACS was confirmed at our centre, coronary angiography was performed;  
44  
45 unstable patients were taken directly for coronary angiography. Stable patients had coronary  
46  
47 angiography scheduled for later the same day, or if the patient arrived outside of standard  
48  
49 working hours, coronary angiography took place on the next available routine list. All  
50  
51 subsequent cardiac care was undertaken at the regional cardiac centre. We aimed to discharge  
52  
53  
54  
55  
56  
57  
58  
59  
60

1  
2  
3 patients within 48 hours of their admission. Patients requiring surgical revascularisation  
4  
5 remained at our centre until surgery was performed.  
6  
7

8  
9  
10 **Outcome measures:** Our primary study endpoint was time to coronary angiography for  
11 patients with NSTEMI-ACS (defined as the time of registration at the DGH Emergency  
12 Department (ED) to beginning of the angiogram procedure). We also measured length of  
13 hospital stay (defined as the time from registration at the DGH Emergency Department to  
14 final hospital discharge). In addition, we have assessed the need for angiography and/or  
15 coronary revascularization, along with discharge diagnosis of the post-HACX group.  
16  
17  
18  
19  
20  
21  
22

23  
24  
25 **Statistical Analysis:** Continuous data with a normal distribution are reported as mean  $\pm$   
26 standard deviation. Skewed data are reported as median and interquartile range. Categorical  
27 data are expressed as percentages. Continuous variables with a normal distribution were  
28 compared by Student's *t*-test. Skewed data were compared using the Mann-Whitney U test.  
29 Categorical variables were compared by the Chi Square or Fisher exact test. Statistical  
30 significance was defined as  $p < 0.05$ . Statistical analyses were performed using SPSS version  
31 18.0 (SPSS Inc, Chicago, IL, USA).  
32  
33  
34  
35  
36  
37  
38  
39  
40  
41  
42

43 **Ethical Considerations:** As the data collected was part of a national cardiac audit project  
44 and all patient identifiers removed prior to data analysis our local ethics committee advised  
45 that formal ethical approval was not required to undertake this study.  
46  
47  
48  
49  
50  
51  
52  
53  
54  
55  
56  
57  
58  
59  
60

## RESULTS

**Patient characteristics** (Table 3): In total 702 patients with NSTEMI-ACS were treated at our institution during the study period. 391 (55.7%) patients were treated in the six months pre-HAC-X, and 311 (44.3%) patients were treated in the six months post-HAC-X.

Patients in the post-HAC-X group were younger (57.0 vs 65.2 years;  $p<0.001$ ) and were more likely to be or have been smokers (58.8% vs 48.6%;  $p=0.009$ ). Hypercholesterolaemia (51.3% vs 46.0%;  $p<0.001$ ), peripheral vascular disease (6.0% vs 1.5%;  $p=0.003$ ) and previous PCI (25.6 vs 14.1%;  $p<0.001$ ) were also observed more frequently in the post-HAC-X group.

**Outcome of invasive investigation** (Figure 1): Pre-HAC-X patients had the diagnosis of NSTEMI-ACS confirmed by a local cardiologist prior to transfer. Therefore all of these patients underwent coronary angiography. Of these, 212 (54.2%) patients subsequently underwent coronary revascularization; 144/212 (67.9%) patients underwent PCI and 68/212 (32.1%) patients were referred for coronary artery bypass graft (CABG) surgery. 179/391 (45.8%) patients did not receive either PCI or CABG, but had coronary disease requiring ongoing medical therapy.

Post HAC-X 250 of the 311 (80.4%) patients transferred to our centre by the new pathway underwent coronary angiography. Of these, 144/250 (57.6%) subsequently underwent coronary revascularization; 108/144 (75.0%) patients underwent PCI and 36/144 (25.0%) patients were referred for coronary artery bypass graft (CABG) surgery, and 106/250 (42.4%) patients were treated with medical therapy alone.

1  
2  
3 **Time to coronary angiography:** The initiation of the HAC-X pathway led to significant  
4 reductions in the median waiting time from DGH Emergency Department admission to  
5 coronary angiography for patients with NSTEMI-ACS. Pre-HAC-X time to angiography was 7.2  
6 (IQR 5.1 to 10.2) days; post-HAC-X this had reduced to 1.0 (IQR 0.7 to 2.0) days ( $p<0.001$ )  
7 (Figure 2). Pre HAC-X only 18% of patients with NSTEMI-ACS underwent coronary  
8 angiography within the recommended 96-hours from presentation. Post HAC-X 90% of  
9 patients underwent coronary angiography within this timeframe (Figure 3).  
10  
11  
12  
13  
14  
15  
16  
17  
18  
19

20 **Length of Hospital Stay:** Median length of hospital stay reduced significantly from 9.0 (IQR  
21 6.0 to 14.0) days pre-HAC-X to 3.0 (IQR 2.0 to 6.0) days post-HAC-X ( $p<0.001$ ). This  
22 equates to a saving of 6 hospital bed days per NSTEMI-ACS admission. As 311 patients with  
23 NSTEMI-ACS were treated according the HAC-X pathway during its first 6 months of  
24 operation we estimated that 1866 hospital bed days were saved during this period.  
25  
26  
27  
28  
29  
30  
31  
32  
33

34 **Clinical efficacy of HAC-X pathway:** 85.5% of patients admitted directly via the HAC-X  
35 pathway had a cardiological diagnosis. NSTEMI-ACS was the discharge diagnosis for 235  
36 (75.5%) of the 311 patients treated according to the HAC-X pathway. A further 31/311  
37 (10.0%) patients had another cardiac cause for chest pain (including pericarditis or  
38 myocarditis) whereas 45/311 (14.5%) of patients had a non-cardiac cause for their symptoms.  
39  
40  
41  
42  
43  
44  
45  
46  
47  
48  
49  
50  
51  
52  
53  
54  
55  
56  
57  
58  
59  
60

## DISCUSSION

The introduction of the HAC-X pathway led to a significant decrease in time from hospital admission to coronary angiography for patients with NSTEMI-ACS. Furthermore, the proportion of patients with NSTEMI-ACS treated within the 96-hour guideline target increased dramatically from 18% pre-HAC-X to 90% post-HAC-X. This novel clinical pathway facilitated the rapid, efficient management of NSTEMI-ACS patients, which has translated into a two-thirds reduction in length of hospital stay.

Direct transfer of patients from the DGH to the regional cardiac centre has proved a far more streamlined approach to NSTEMI-ACS care. Not only was the length of hospital stay decreased but all patients managed via the HAC-X pathway also avoided an unnecessary admission to their local DGH. The HAC-X pathway was only feasible because all parties involved (cardiac centre, DGHs, and local health care commission) were motivated to contribute to the project. The benefit of the HAC-X pathway to the referring DGH is immediately evident. Direct transfer of patients with NSTEMI-ACS results in a huge reduction in 'wasted' hospital bed days. Furthermore, the HAC-X pathway has an additional cost benefit as it avoids local health care commissioners from having to fund 2 admission tariffs for the same index event. Prior to the initiation of the HAC-X the local health care commission was paying admission tariffs to both the DGH, and the regional cardiac centre. Alternative transfer strategies for patients with NSTEMI-ACS, such as regional transfer units [8], and same day 'repatriation' of patients to the referring hospital after PCI [9], have been described, and result in more efficient bed usage and reduced time to angiography in patients with NSTEMI-ACS. However, these management strategies require admission tariffs at both the referring DGH and also the cardiac centre. The HAC-X service did require the cardiac center to invest in more bed capacity that inevitably increased the cost of the pathway to the cardiac center.



1  
2  
3  
4  
5 The success of this pathway, which aims to transfer patients to a specialist centre without  
6 admission to the local hospital is critically dependent upon an accurate early diagnosis both  
7 for obvious clinical reasons and, in the UK, to facilitate transfer out of the Emergency  
8 Department within the four hour target. Patients with NSTEMI-ACS form a heterogeneous group  
9 yet the simple inclusion criteria for the HAC-X pathway of clinical symptoms of ACS plus  
10 either a positive point of care troponin assay or electrocardiographic changes consistent with  
11 myocardial ischaemia enabled an accurate diagnosis to be made in more than three-quarters  
12 of patients. This is comparable with diagnostic accuracy rates for patients delivered to Heart  
13 Attack Centres for acute STEMI management.  
14  
15  
16  
17  
18  
19  
20  
21  
22  
23  
24  
25  
26

27 The proportion of patients undergoing coronary revascularization post-HAC-X is in line with  
28 contemporary observational data of NSTEMI-ACS management [10]. It is also similar to our  
29 historical revascularization rates for patients with NSTEMI-ACS. Therefore, diagnostic criteria  
30 for the HAC-X pathway appear to perform as well the traditional model of care in their  
31 ability to identify patients with NSTEMI-ACS who will benefit from revascularization.  
32 Importantly these diagnostic criteria identify these patients more quickly. This is key to the  
33 success of a model that aims to transfer patients direct from the Emergency Department to the  
34 cardiac centre in a systematic way.  
35  
36  
37  
38  
39  
40  
41  
42  
43  
44  
45  
46

47 The inclusion criteria for the pre-HAC-X and post-HAC-X cohorts are subtly different. Pre-  
48 HAC-X, patients with suspected NSTEMI-ACS were admitted to the DGH for medical  
49 stabilization and cardiology review. If a local cardiologist confirmed the diagnosis of NSTEMI-  
50 ACS, and felt coronary angiography was appropriate, then the patients were transferred to the  
51 interventional cardiac centre for invasive investigation and management. Thus the pre-HAC-  
52  
53  
54  
55  
56  
57  
58  
59  
60

1  
2  
3 X cohort consisted only of patients with confirmed NSTEMI-ACS undergoing coronary  
4 angiography. The post HAC-X cohort consisted of patients with suspected NSTEMI-ACS  
5 transferred directly from the Emergency Department. The diagnosis of NSTEMI-ACS was not  
6 confirmed until cardiology review at the cardiac centre, and inevitably the post-HAC-X  
7 cohort contained some patients who proved to have an alternate diagnosis and did not  
8 undergo coronary angiography.  
9  
10  
11  
12  
13  
14  
15  
16  
17  
18

19 Patients with a final non-cardiac diagnosis comprised about 15% of post-HAC-X patients.  
20 This group incorporated both patients who failed to meet the pathway's inclusion criteria who  
21 were transferred inappropriately and patients who had chest pain with an abnormal ECG but  
22 who were subsequently shown to have a negative troponin measured 12 hours after onset of  
23 symptoms. In patients in whom myocardial infarction was suspected at presentation, the rapid  
24 access to coronary angiography and early demonstration of unobstructed coronary arteries  
25 allowed other cardiac diagnoses to be considered. In patients with a 'non-coronary' cardiac  
26 diagnosis, such as myocarditis, the early access to advanced non-invasive cardiac imaging at  
27 the cardiac centre undoubtedly streamlined their hospital admission, allowing earlier  
28 diagnosis and treatment. The small proportion of patients transferred with a non-cardiac  
29 diagnosis could be treated then discharged rapidly and safely from the cardiac centre,  
30 meaning that they were little burden upon our resources. Although we strived to manage the  
31 vast majority of post HAC-X patients exclusively at the cardiac centre, a small proportion of  
32 patients with a non-cardiac diagnosis were 'repatriated' to their district hospital for  
33 specialized further management of their condition.  
34  
35  
36  
37  
38  
39  
40  
41  
42  
43  
44  
45  
46  
47  
48  
49  
50  
51  
52  
53

54 It should be noted that direct comparison of pre-HAC-X and post-HAC-X patients is  
55 problematic. Inclusion to the study occurred once patients were transferred to the cardiac  
56  
57  
58  
59  
60

1  
2  
3 centre (for coronary angiography in pre-HAC-X patients, and with suspected NSTEMI-ACS for  
4 assessment and/or coronary angiography in post-HAC-X patients) rather than at the district  
5 hospital. As a result, a proportion of patients in the post-HAC-X group, after review at the  
6 cardiac centre were thought to have a non-coronary diagnosis, and did not undergo coronary  
7 angiography. Undoubtedly, before the initiation of the HAC-X pathway a number of patients  
8 were admitted to the district hospital with suspected NSTEMI-ACS, but this diagnosis was  
9 discounted after local cardiology review. These patients initially suspected to have NSTEMI-  
10 ACS, but later proven to have a non-coronary diagnosis, whilst still in their district hospital  
11 were not included in the pre-HAC-X cohort. Furthermore, there are important differences in  
12 the baseline demographics between the patient cohorts (Table 2). Post-HAC-X patients were  
13 younger, more likely to be current smokers and more commonly had a history of  
14 hypercholesterolaemia, previous PCI and peripheral vascular disease. There are several  
15 potential explanations for these differences in cohort demographics. Firstly, the presence of  
16 coronary risk factors or a history of previous PCI in patients presenting to the emergency  
17 department with chest pain is likely to stimulate early cardiac investigations. Inclusion  
18 criteria for the HAC-X pathway were diagnosis of NSTEMI-ACS whilst in the Emergency  
19 Department. Older patients with a paucity of coronary risk factors and no previous cardiac  
20 history may have had a delayed NSTEMI-ACS diagnosis meaning they could not be transferred  
21 directly from the Emergency Department via the HAC-X pathway. Secondly, patients with  
22 major medical comorbidities that precluded early angiography were specifically excluded  
23 from the HAC-X pathway. This is likely to introduce a degree of selection bias within the  
24 cohorts. The post-HAC-X cohort was generally younger and fitter, and this may have  
25 facilitated early discharge and a reduced length of hospital stay. Importantly, NSTEMI-ACS  
26 patients with exclusions to the HAC-X pathway who were clinically unstable were always  
27  
28  
29  
30  
31  
32  
33  
34  
35  
36  
37  
38  
39  
40  
41  
42  
43  
44  
45  
46  
47  
48  
49  
50  
51  
52  
53  
54  
55  
56  
57  
58  
59  
60

1  
2  
3 transferred to the interventional centre for further management, although these patients are  
4  
5 not represented in this study.  
6  
7

8  
9  
10 **Limitations of study:** A number of limitations of this study are worthy of note; firstly, this  
11 was an observational study designed to evaluate the feasibility of a novel change in practice  
12 to reduce waiting times for coronary angiography in patients with NSTEMI-ACS. We did not  
13 collect clinical outcome data upon the entire cohort and so can only speculate as to whether  
14 the initiation of this pathway provided clinical benefit to the patients presenting with NSTEMI-  
15 ACS. Secondly point of care troponin testing was not available in the emergency departments  
16 until the initiation of the HAC-X pathway. Thus pre-HAC-X, patients will have undergone  
17 laboratory troponin testing whereas post-HAC-X patients underwent point of care troponin  
18 testing. These troponin assays, have differing sensitivity and specificities; for example point  
19 of care assays are designed to be highly sensitive, but may lack specificity compared with  
20 standard laboratory assays [11]. This may predispose to the inclusion of patients with  
21 presumed NSTEMI-ACS who subsequently receive a non-cardiac diagnosis. Despite this  
22 limitation inappropriate transfers via the HAC-X pathway were infrequent. The HAC-X  
23 clinical pathway was designed to identify patients with NSTEMI-ACS whilst they remained in  
24 the Emergency Department. There are patients with suspected NSTEMI-ACS with an initially  
25 normal ECG and negative point of care troponin, that develop ECG abnormalities or a  
26 positive troponin assay later in their hospital admission. Thus some patients with NSTEMI-ACS  
27 continued to be admitted to the DGH even after the initiation of the HAC-X pathway. NSTEMI-  
28 ACS patients admitted to the DGH, in the post-HAC-X era were managed in a similar fashion  
29 to pre-HAC-X patients, with medical stabilization and transfer to the interventional centre  
30 once a bed became available. We have not collected data upon this small group of patients.  
31 We do not know how the inclusion of these patients may have affected our results. Thirdly,  
32  
33  
34  
35  
36  
37  
38  
39  
40  
41  
42  
43  
44  
45  
46  
47  
48  
49  
50  
51  
52  
53  
54  
55  
56  
57  
58  
59  
60

1  
2  
3 two of the six DGH's served by the London Chest Hospital have on-site cardiac  
4 catheterization laboratories offering diagnostic coronary angiography but not PCI.  
5  
6  
7 Potentially, a small number of patients with suspected NSTEMI-ACS could have undergone  
8  
9  
10 diagnostic coronary angiography locally and then either been discharged if no coronary  
11  
12 revascularization was indicated or referred directly for coronary surgery. As patient data for  
13  
14 this study was collected only after referral for coronary angiography and/or PCI at the  
15  
16 interventional centre these patients with NSTEMI-ACS bypassed study enrolment and thus are  
17  
18 not represented within the study cohort. However, we believe that the standardized transfer  
19  
20 criteria for NSTEMI-ACS patients central to the HAC-X pathway would make DGH admission  
21  
22 and local angiography for NSTEMI-ACS patients less common in the post-HAC-X period.  
23  
24 Finally, the cardiac centre increased bed capacity, providing a dedicated 6 bed ward for  
25  
26 patients admitted via the HAC-X pathway. The small increase in the total bed capacity of the  
27  
28 hospital coupled with more efficient utilization of inpatient beds allowed the HAC-X  
29  
30 pathway to function. Potentially, these changes may confound our results, as they may  
31  
32 influence both time to coronary angiography and length of hospital stay.  
33  
34  
35  
36  
37  
38  
39  
40  
41  
42  
43  
44  
45  
46  
47  
48  
49  
50  
51  
52  
53  
54  
55  
56  
57  
58  
59  
60

## THE FUTURE

Delivery of coronary angiography within 96 hours for NSTEMI-ACS patients admitted to hospitals without facilities for invasive cardiac investigations is challenging. The HAC-X pathway is effective in identifying patients with NSTEMI-ACS for transfer directly to the regional cardiac centre avoiding unnecessary delays in treatment. Use of this model, modified according to local circumstances, could be applied nationally to streamline the management of NSTEMI-ACS patients. The investment required for 'HAC-X' beds would be more than offset by the resulting savings in hospital bed days.

## CONCLUSION

The introduction of this novel care pathway was associated with significant reductions in time to angiography and in total hospital bed occupancy for patients with NSTEMI-ACS. We have demonstrated its feasibility in routine clinical practice so this model could be used more widely to streamline the management of NSTEMI-ACS patients.

## References

1. Keeley E, Boura J, Grines C. Primary angioplasty versus intravenous thrombolytic therapy for acute myocardial infarction: a quantitative review of 23 randomised trials. *Lancet* 2003; 361:13-20.
2. Van De Werf F, Bax J, Betriu A, et al. Management of acute myocardial infarction in patients presenting with persistent ST-segment elevation: the Task Force on the Management of ST-Segment Elevation Acute Myocardial Infarction of the European Society of Cardiology. *Eur Heart J* 2008; 29:2909-2945.
3. Myocardial Ischaemia National Audit Project: How the NHS cares for patients with heart attack. 2010; London:
4. Allen L, O'Donnell CJ, Camargo CJ, et al. Comparison of long-term mortality across the spectrum of acute coronary syndromes. *Am Heart J* 2006; 151:1065-1071.
5. Hamm C, Bassand J, Agewall S, et al. ESC Guidelines for the management of acute coronary syndromes in patients presenting without persistent ST-segment elevation: The Task Force for the management of acute coronary syndromes (ACS) in patients presenting without persistent ST-segment elevation of the European Society of Cardiology (ESC). *Eur Heart J* 2011; 32:2999-3054.
6. Bellenger N, Eichhofer J, Crone D, et al. Hospital stay in patients with non-ST-elevation acute coronary syndromes. *Lancet* 2004; 363:1399-1400.
7. CHD Collaborative. National Interhospital Transfer Audit. Presented at the CHD national transfer meeting 2004 and the British Cardiac Society annual meeting 2004. <http://www.heart.nhs.uk>.
8. Bellenger N, Wells T, Hitchcock R, et al. Reducing transfer times for coronary angiography in patients with acute coronary syndromes: one solution to a national problem. *Postgrad Med J* 2006; 82:411-413.
9. Andersen J, Klow N, Johansen O. Safe and feasible immediate retransfer of patients to the referring hospital after acute coronary angiography and percutaneous coronary angioplasty for patients with acute coronary syndrome. *Eur Heart J Acute Cardiovasc Care* 2013; 2:256-261.
10. Zia M, Goodman S, Peterson E, et al. Paradoxical use of invasive cardiac procedures for patients with non-ST segment elevation myocardial infarction: an international perspective from the CRUSADE Initiative and the Canadian ACS Registries I and II. *Can J Cardiol* 2007; 23:1073-1079.
11. Bock J, Singer A, Thode HJ. Comparison of emergency department patient classification by point-of-care and central laboratory methods for cardiac troponin I. *Am J Clin Pathol* 2008; 130:132-135.

1  
2  
3  
4  
5  
6  
7  
8  
9  
10  
11  
12  
13  
14  
15  
16  
17  
18  
19  
20  
21  
22  
23  
24  
25  
26  
27  
28  
29  
30  
31  
32  
33  
34  
35  
36  
37  
38  
39  
40  
41  
42  
43  
44  
45  
46  
47  
48  
49  
50  
51  
52  
53  
54  
55  
56  
57  
58  
59  
60

For peer review only



**Footnotes**

**Contributions:** SG and AJ conceived and designed the study. SG, MJL, DAJ, EF, SC, ZB and RAA acquired the data. SG, MJL, DAJ, and AJ analysed and interpreted the data. SG and MJL carried out statistical analysis. SG, MJL, RAA, AW and AJ drafted the original manuscript. SG, MJL, DAJ, AW, SC, EJS, RAA, CK, AM, MTR and AJ critically revised the manuscript for important intellectual content.

**Funding:** There was no funding for this study.

**Conflicts of interests:** None of the authors of this manuscript have any conflicts of interest to declare.

**Data sharing:** No additional unpublished data available

Table 1. Inclusion and Exclusion Criteria for HAC-X clinical pathway

|                           |                                                                                                                                                                                            |
|---------------------------|--------------------------------------------------------------------------------------------------------------------------------------------------------------------------------------------|
| <b>Inclusion criteria</b> | <b>Symptoms suggestive of myocardial ischaemia</b><br>With a positive troponin assay<br>OR ECG changes including:<br>ST depression;<br>T wave inversion in V1-4;<br>Dynamic T wave changes |
| <b>Exclusion criteria</b> | Unexplained anaemia (Hb <10 g/dL)<br>Hypoxia<br>Acute renal failure<br>Loss of consciousness(unless secondary to cardiac arrhythmia)<br>Recent trauma<br>Overt sepsis                      |

1  
2  
3 **Table 2. Evidence based immediate medical therapy for patients with NSTEMI treated**  
4 **via the HAC-X clinical pathway**  
5

6 Immediate evidence based therapy given at DGH included,  
7

8 Aspirin 300mg

9 Clopidogrel 600 mg

10 Fondaparinux 2.5 mg

11 Eptifibatide bolus (180 mg/kg) as long as no contraindications  
12  
13  
14  
15  
16  
17  
18  
19  
20  
21  
22  
23  
24  
25  
26  
27  
28  
29  
30  
31  
32  
33  
34  
35  
36  
37  
38  
39  
40  
41  
42  
43  
44  
45  
46  
47  
48  
49  
50  
51  
52  
53  
54  
55  
56  
57  
58  
59  
60

**Table 3. Clinical Characteristics of the study cohort**

| Variables                                 | Pre-HAC-X<br>n=391 | Post-HAC-X<br>n=311 | p value |
|-------------------------------------------|--------------------|---------------------|---------|
| <b>Age (years)</b>                        | 65.2 +/-12.6       | 57.0 +/-13.9        | <0.001  |
| <b>Gender:</b>                            |                    |                     | 0.884   |
| Male (%)                                  | 70.8               | 70.0                |         |
| Female (%)                                | 29.2               | 30.0                |         |
| <b>Smoking status:</b>                    |                    |                     | 0.009   |
| Current (%)                               | 18.2               | 29.6                |         |
| Ex-smoker (%)                             | 30.4               | 31.9                |         |
| Never (%)                                 | 51.4               | 41.2                |         |
| <b>Diabetes:</b>                          |                    |                     | 0.205   |
| Insulin requiring (%)                     | 6.1                | 9.7                 |         |
| Non-Insulin requiring(%)                  | 24.8               | 22.6                |         |
| Not diabetic (%)                          | 69.1               | 67.7                |         |
| <b>Hypertension (%)</b>                   | 62.7               | 59.7                | 0.241   |
| <b>Hypercholesterolaemia (%)</b>          | 46.0               | 51.3                | 0.001   |
| <b>Previous myocardial infarction (%)</b> | 30.7               | 34.9                | 0.29    |
| <b>Previous PCI (%)</b>                   | 14.1               | 25.5                | <0.001  |
| <b>Previous CABG (%)</b>                  | 11.5               | 11.2                | 0.994   |
| <b>Peripheral vascular disease (%)</b>    | 1.5                | 6.0                 | 0.003   |
| <b>Previous stroke (%)</b>                | 6.7                | 8.1                 | 0.58    |

## Figure Legends

**Figure 1.** Flow diagram of patients with suspected ACS treated before (Pre-HAC-X) and after (Post-HAC-X) the initiation of the HAC-X clinical pathway describing access to coronary angiography and subsequent management strategy

**Figure 2.** Bee swarm boxplot demonstrating the time the ED admission to coronary angiography for patients with suspected ACS treated before (Pre-HAC-X) and after (Post-HAC-X) the initiation of the HAC-X clinical pathway. Each point represents the time taken to undergo coronary angiography for an individual patient.

**Figure 3.** The proportion of patients with suspected ACS undergoing coronary angiography within recommended 96 hours of hospital admission before (Pre-HAC-X) and after (Post-HAC-X) the initiation of the HAC-X clinical pathway.

1  
2  
3 **A “DIRECT” TRANSFER PROTOCOL REDUCES TIME TO CORONARY**  
4 **ANGIOGRAPHY FOR PATIENTS WITH NON ST-ELEVATION ACUTE**  
5 **CORONARY SYNDROMES**  
6  
7

8  
9 Gallagher SM <sup>1,2,3</sup>, Lovell MJ <sup>1</sup>, Jones DA <sup>1,2,4</sup>, Ferguson E <sup>1</sup>, Ahktar A <sup>1</sup>, Buckhoree Z <sup>1</sup>, Wragg A <sup>1,2</sup>,  
10 Knight CJ <sup>1,2</sup>, Mathur A <sup>1,2,4</sup>, Smith EJ <sup>1,2</sup>, Cliffe S <sup>1</sup>, Archbold RA <sup>1,2</sup>, Rothman MT <sup>1</sup> and Jain AK <sup>1,2</sup>  
11

12  
13  
14 <sup>1</sup> Department of Cardiology, Barts Health NHS Trust

15  
16 <sup>2</sup> NIHR Cardiovascular Biomedical Research Unit, London Chest Hospital, London

17  
18 <sup>3</sup> Department of Translational Medicine and Therapeutics, William Harvey Research, Queen Mary College,  
19 London

20  
21 <sup>4</sup> Department of Clinical Pharmacology, William Harvey Research Institute, Queen Mary College, London  
22  
23  
24  
25

26 Corresponding address:  
27

28 Dr AK Jain  
29

30 Department of Cardiology,  
31

32 London Chest Hospital,  
33

34 Bonner Road,  
35

36 London,  
37

38 E2 9JX  
39

40 Phone number: 020 898 32248  
41

42 Email: [ajay.jain@bartshealth.nhs.uk](mailto:ajay.jain@bartshealth.nhs.uk)  
43  
44  
45  
46  
47  
48  
49  
50  
51  
52  
53  
54  
55  
56  
57  
58  
59  
60

## Abstract

**Objective:** National guidelines recommend 'early' coronary angiography within 96 h of presentation for patients with non-ST elevation acute coronary syndromes (NSTEMI-ACS). Most patients with NSTEMI-ACS present to their district general hospital (DGH), and await transfer to the regional cardiac centre for angiography. This care model has inherent time delays, and delivery of timely angiography is problematic. The objective of this study was to assess a novel clinical care pathway for the management of NSTEMI-ACS, known locally as the Heart Attack Centre-Extension or HAC-X, designed to rapidly identify patients with NSTEMI-ACS while in DGH emergency departments (ED) and facilitate transfer to the regional interventional centre for 'early' coronary angiography.

**Methods:** This was an observational study of 702 patients divided into two groups; 391 patients treated before the instigation of the HAC-X pathway (Pre-HACX), and 311 patients treated via the novel pathway (Post-HACX). Our primary study end point was time from ED admission to coronary angiography. We also assessed the length of hospital stay.

**Results:** Median time from ED admission to coronary angiography was 7.2 (IQR 5.1 - 10.2) days pre-HAC-X compared to 1.0 (IQR 0.7 - 2.0) day post-HAC-X ( $p < 0.001$ ). Median length of hospital stay was 3.0 (IQR 2.0-6.0) days post-HAC-X v 9.0 (IQR 6.0-14.0) days pre-HAC-X ( $p < 0.0005$ ). This equates to a reduction of six hospital bed days per NSTEMI-ACS admission.

**Conclusions:** The introduction of this novel care pathway was associated with significant reductions in time to angiography and in total hospital bed occupancy for patients with NSTEMI-ACS.

## Article summary

### Article focus

This paper describes the effect of a novel care pathway for patients with NSTEMI-ACS upon waiting times for coronary angiography and total length of hospital stay when it was introduced at a large regional interventional cardiac centre in East London.

### Key messages

After the introduction of this novel care pathway,

1. Time from hospital admission to coronary angiography for patients with NSTEMI-ACS was reduced by 6 days.
2. Length of hospital admission for patients with NSTEMI-ACS was reduced by two-thirds.

The use of this model modified according to local circumstances could be applied nationally to streamline the management of NSTEMI-ACS patients.

### Strengths and limitations of this paper

This paper describes the introduction of the first clinical pathway of its type in UK. Logistical delays in delivering early angiography for patients with NSTEMI-ACS remains a problem, thus our real-world data demonstrating a streamlined care pathway for these high-risk patients is extremely relevant.

This is not randomized data. The paper describes management of patients with NSTEMI-ACS before and after the introduction of the new care pathway. As with all observational studies it is open to residual bias and unknown confounding factors.



## INTRODUCTION

Acute coronary syndromes (ACS) encompass a spectrum of clinical presentations that include ST elevation myocardial infarction (STEMI), non-ST elevation myocardial infarction (NSTEMI), and unstable angina (UA). In recent years, patients who present with STEMI have benefited from a shift from thrombolytic therapy to primary percutaneous coronary intervention (PCI) [1, 2]. The latest Myocardial Ischaemia National Audit Project (MINAP) data demonstrates that this change in practice has been implemented remarkably quickly across most parts of the UK so that the majority of patients with STEMI are now treated with primary PCI [3]. Targets supported by the Health Care Commission based on time from symptom onset to opening of the infarct-related artery set a standard against which models of care for patients with STEMI are measured and these targets have driven reductions in treatment times and improved clinical outcomes [3].

Non ST elevation ACS (NSTEMI-ACS) accounts for a far greater proportion of ACS admissions than STEMI each year [3]. NSTEMI-ACS is considered a 'high-risk' clinical condition, associated with one-year mortality rates greater than or equal to those seen after STEMI [4]. International treatment guidelines recommend that patients with NSTEMI-ACS are managed with immediate medical therapy followed by early coronary angiography (and PCI if appropriate) within 72-96 hours of hospital admission [5], and within 24 hours for the highest risk patients [5]. Despite these guidelines recommending early invasive management of patients with NSTEMI-ACS, standard care pathways rarely achieve these evidence-based treatment timeframes.

The delivery of care for patients with NSTEMI-ACS has changed little in the last 10 years. Most patients with NSTEMI-ACS present to a hospital without a cardiac catheter laboratory where

1  
2  
3 they wait for transfer to the regional interventional cardiac centre for coronary angiography  
4  
5 [6]. This model of care results in unacceptable delays to treatment [7] which are detrimental  
6  
7 to patient outcomes and which waste healthcare resources. A systematic approach to early  
8  
9 diagnosis, risk stratification and 'direct' transfer to an interventional cardiac centre has the  
10  
11 potential to minimise unnecessary delays for coronary angiography, to reduce hospital stays,  
12  
13 and to prevent recurrent ischaemic cardiac events in higher risk patients.  
14  
15

16  
17  
18 The London Chest Hospital is a regional interventional cardiac centre serving a population of  
19  
20 approximately 1.8 million in North East London. The hospital provides coronary  
21  
22 angiography, PCI, and cardiac surgery for six district general hospitals (DGH) in the region.  
23  
24 Here we have devised a new clinical pathway for the management of patients with NTE-ACS  
25  
26 that built upon our experience from developing a network-wide STEMI service. This new  
27  
28 pathway known locally as the Heart Attack Centre Extension or 'HAC-X' service aims to  
29  
30 transfer those patients with NSTEMI-ACS who can be diagnosed within four hours of  
31  
32 presentation directly from the Emergency Department to the regional interventional cardiac  
33  
34 centre avoiding unnecessary admission to the local hospital.  
35  
36  
37  
38  
39

40  
41 This article represents a prospective study that monitored the implementation of this novel  
42  
43 clinical HAC-X pathway for the management of patients with NSTEMI-ACS. The aim of the  
44  
45 HAC-X pathway was to facilitate the early invasive management of patients with NSTEMI-  
46  
47 ACS. Potentially this streamlined approach to NSTEMI-ACS management would represent a  
48  
49 more efficient use of NHS resources.  
50  
51  
52  
53  
54  
55  
56  
57  
58  
59  
60

## METHODS

We have undertaken a prospective observational study of the management of patients with NSTEMI-ACS treated at our institution between October 2009 and October 2010. This study period represents the last six months of our previous NSTEMI-ACS care model and the first six months of the new HAC-X pathway.

**Study population:** Patients were eligible for inclusion in this study if they presented to a DGH Emergency Department participating in the HAC-X project and were subsequently transferred to our institution for further management.

Inclusion criteria for the HAC-X clinical pathway (Table 1) and therefore study inclusion criteria were an admission diagnosis of NSTEMI-ACS with chest pain within 24 hours of presentation plus either an elevated blood troponin T or troponin I concentration, or electrocardiographic changes compatible with ischaemia (defined as ST-segment depression  $\geq 1$  mm or T-wave inversion  $\geq 2$  mm in two contiguous leads, or biphasic ST/T wave segments indicative of a critical stenosis in the left anterior descending artery). Patients were excluded if they had a contraindication to early interventional management including major medical comorbidity, unexplained anaemia (haemoglobin concentration  $< 10$  g/dL), acute renal failure, recent traumatic injury or loss of consciousness (except when secondary to cardiac arrhythmia), overt sepsis, or unexplained hypoxia.

During the twelve-month study period, 702 patients with NSTEMI-ACS were treated at our institution. These patients were divided into two groups for subsequent analysis; 391 patients treated before the instigation of the HAC-X pathway (pre-HAC-X), and 311 patients treated via the novel pathway (post-HAC-X).

1  
2  
3  
4  
5 **Study protocol:** The London Chest Hospital is a ‘stand-alone’ regional interventional cardiac  
6  
7 centre. It has no onsite emergency department and only patients with suspected ST elevation  
8  
9 myocardial infarction are admitted directly to the hospital. All patients with suspected NSTEMI-  
10  
11 ACS must first be seen at a DGH before transfer.  
12  
13

14  
15  
16 During the first six months of the study period (pre-HAC-X) the model of care for patients  
17  
18 with NSTEMI-ACS involved admission to their local DGH for ‘medical stabilisation’ pending  
19  
20 availability of a bed at the regional interventional cardiac centre for transfer for coronary  
21  
22 angiography (and/or PCI). Clinical instability prompted more urgent transfer and patients  
23  
24 were usually transferred back to their local hospital for discharge following invasive cardiac  
25  
26 treatment.  
27  
28

29  
30  
31 After the initiation of the HAC-X pathway in April 2010 (post HAC-X) patients diagnosed  
32  
33 with NSTEMI-ACS in the DGH Emergency Department, and meeting the inclusion criteria for  
34  
35 the HAC-X pathway (Table 1) received protocol driven evidence based medical therapy  
36  
37 (Table 2) and were transferred to our institution directly within 1 hour of diagnosis. There  
38  
39 was no requirement for ECG review or prior notification of the patient’s transfer to our centre  
40  
41 but clinical advice could be sought in cases of diagnostic uncertainty. If the admission  
42  
43 diagnosis of NSTEMI-ACS was confirmed at our centre, coronary angiography was performed;  
44  
45 unstable patients were taken directly for coronary angiography. Stable patients had coronary  
46  
47 angiography scheduled for later the same day, or if the patient arrived outside of standard  
48  
49 working hours, coronary angiography took place on the next available routine list. All  
50  
51 subsequent cardiac care was undertaken at the regional cardiac centre. We aimed to discharge  
52  
53  
54  
55  
56  
57  
58  
59  
60

1  
2  
3 patients within 48 hours of their admission. Patients requiring surgical revascularisation  
4  
5 remained at our centre until surgery was performed.  
6  
7

8  
9  
10 **Outcome measures:** Our primary study endpoint was time to coronary angiography for  
11 patients with NSTEMI-ACS (defined as the time of registration at the DGH Emergency  
12 Department (ED) to beginning of the angiogram procedure). We also measured length of  
13 hospital stay (defined as the time from registration at the DGH Emergency Department to  
14 final hospital discharge). In addition, we have assessed the need for angiography and/or  
15 coronary revascularization, along with discharge diagnosis of the post-HACX group.  
16  
17  
18  
19  
20  
21  
22

23  
24  
25 **Statistical Analysis:** Continuous data with a normal distribution are reported as mean  $\pm$   
26 standard deviation. Skewed data are reported as median and interquartile range. Categorical  
27 data are expressed as percentages. Continuous variables with a normal distribution were  
28 compared by Student's *t*-test. Skewed data were compared using the Mann-Whitney U test.  
29  
30 Categorical variables were compared by the Chi Square or Fisher exact test. Statistical  
31 significance was defined as  $p < 0.05$ . Statistical analyses were performed using SPSS version  
32 18.0 (SPSS Inc, Chicago, IL, USA).  
33  
34  
35  
36  
37  
38  
39  
40  
41  
42

43 **Ethical Considerations:** As the data collected was part of a national cardiac audit project  
44 and all patient identifiers removed prior to data analysis our local ethics committee advised  
45 that formal ethical approval was not required to undertake this study.  
46  
47  
48  
49  
50  
51  
52  
53  
54  
55  
56  
57  
58  
59  
60

## RESULTS

**Patient characteristics** (Table 3): In total 702 patients with NSTEMI-ACS were treated at our institution during the study period. 391 (55.7%) patients were treated in the six months pre-HAC-X, and 311 (44.3%) patients were treated in the six months post-HAC-X.

Patients in the post-HAC-X group were younger (57.0 vs 65.2 years;  $p<0.001$ ) and were more likely to be or have been smokers (58.8% vs 48.6%;  $p=0.009$ ). Hypercholesterolaemia (51.3% vs 46.0%;  $p<0.001$ ), peripheral vascular disease (6.0% vs 1.5%;  $p=0.003$ ) and previous PCI (25.6 vs 14.1%;  $p<0.001$ ) were also observed more frequently in the post-HAC-X group.

**Outcome of invasive investigation** (Figure 1): Pre-HAC-X patients had the diagnosis of NSTEMI-ACS confirmed by a local cardiologist prior to transfer. Therefore all of these patients underwent coronary angiography. Of these, 212 (54.2%) patients subsequently underwent coronary revascularization; 144/212 (67.9%) patients underwent PCI and 68/212 (32.1%) patients were referred for coronary artery bypass graft (CABG) surgery. 179/391 (45.8%) patients did not receive either PCI or CABG, but had coronary disease requiring ongoing medical therapy.

Post HAC-X 250 of the 311 (80.4%) patients transferred to our centre by the new pathway underwent coronary angiography. Of these, 144/250 (57.6%) subsequently underwent coronary revascularization; 108/144 (75.0%) patients underwent PCI and 36/144 (25.0%) patients were referred for coronary artery bypass graft (CABG) surgery, and 106/250 (42.4%) patients were treated with medical therapy alone.

1  
2  
3 **Time to coronary angiography:** The initiation of the HAC-X pathway led to significant  
4 reductions in the median waiting time from DGH Emergency Department admission to  
5 coronary angiography for patients with NSTEMI-ACS. Pre-HAC-X time to angiography was 7.2  
6 (IQR 5.1 to 10.2) days; post-HAC-X this had reduced to 1.0 (IQR 0.7 to 2.0) days ( $p<0.001$ )  
7 (Figure 2). Pre HAC-X only 18% of patients with NSTEMI-ACS underwent coronary  
8 angiography within the recommended 96-hours from presentation. Post HAC-X 90% of  
9 patients underwent coronary angiography within this timeframe (Figure 3).  
10  
11  
12  
13  
14  
15  
16  
17  
18  
19

20 **Length of Hospital Stay:** Median length of hospital stay reduced significantly from 9.0 (IQR  
21 6.0 to 14.0) days pre-HAC-X to 3.0 (IQR 2.0 to 6.0) days post-HAC-X ( $p<0.001$ ). This  
22 equates to a saving of 6 hospital bed days per NSTEMI-ACS admission. As 311 patients with  
23 NSTEMI-ACS were treated according the HAC-X pathway during its first 6 months of  
24 operation we estimated that 1866 hospital bed days were saved during this period.  
25  
26  
27  
28  
29  
30  
31  
32  
33

34 **Clinical efficacy of HAC-X pathway:** 85.5% of patients admitted directly via the HAC-X  
35 pathway had a cardiological diagnosis. NSTEMI-ACS was the discharge diagnosis for 235  
36 (75.5%) of the 311 patients treated according to the HAC-X pathway. A further 31/311  
37 (10.0%) patients had another cardiac cause for chest pain (including pericarditis or  
38 myocarditis) whereas 45/311 (14.5%) of patients had a non-cardiac cause for their symptoms.  
39  
40  
41  
42  
43  
44  
45  
46  
47  
48  
49  
50  
51  
52  
53  
54  
55  
56  
57  
58  
59  
60

## DISCUSSION

The introduction of the HAC-X pathway led to a significant decrease in time from hospital admission to coronary angiography for patients with NSTEMI-ACS. Furthermore, the proportion of patients with NSTEMI-ACS treated within the 96-hour guideline target increased dramatically from 18% pre-HAC-X to 90% post-HAC-X. This novel clinical pathway facilitated the rapid, efficient management of NSTEMI-ACS patients, which has translated into a two-thirds reduction in length of hospital stay.

Direct transfer of patients from the DGH to the regional cardiac centre has proved a far more streamlined approach to NSTEMI-ACS care. Not only was the length of hospital stay decreased but all patients managed via the HAC-X pathway also avoided an unnecessary admission to their local DGH. The HAC-X pathway was only feasible because all parties involved (cardiac centre, DGHs, and local health care commission) were motivated to contribute to the project. The benefit of the HAC-X pathway to the referring DGH is immediately evident. Direct transfer of patients with NSTEMI-ACS results in a huge reduction in 'wasted' hospital bed days. Furthermore, the HAC-X pathway has an additional cost benefit as it avoids local health care commissioners from having to fund 2 admission tariffs for the same index event. Prior to the initiation of the HAC-X the local health care commission was paying admission tariffs to both the DGH, and the regional cardiac centre. Alternative transfer strategies for patients with NSTEMI-ACS, such as regional transfer units [8], and same day 'repatriation' of patients to the referring hospital after PCI [9], have been described, and result in more efficient bed usage and reduced time to angiography in patients with NSTEMI-ACS. However, these management strategies require admission tariffs at both the referring DGH and also the cardiac centre. The HAC-X service did require the cardiac center to invest in more bed capacity that inevitably increased the cost of the pathway to the cardiac center.



1  
2  
3  
4  
5 The success of this pathway, which aims to transfer patients to a specialist centre without  
6 admission to the local hospital is critically dependent upon an accurate early diagnosis both  
7 for obvious clinical reasons and, in the UK, to facilitate transfer out of the Emergency  
8 Department within the four hour target. Patients with NSTEMI-ACS form a heterogeneous group  
9 yet the simple inclusion criteria for the HAC-X pathway of clinical symptoms of ACS plus  
10 either a positive point of care troponin assay or electrocardiographic changes consistent with  
11 myocardial ischaemia enabled an accurate diagnosis to be made in more than three-quarters  
12 of patients. This is comparable with diagnostic accuracy rates for patients delivered to Heart  
13 Attack Centres for acute STEMI management.  
14  
15  
16  
17  
18  
19  
20  
21  
22  
23  
24

25  
26  
27 The proportion of patients undergoing coronary revascularization post-HAC-X is in line with  
28 contemporary observational data of NSTEMI-ACS management [10]. It is also similar to our  
29 historical revascularization rates for patients with NSTEMI-ACS. Therefore, diagnostic criteria  
30 for the HAC-X pathway appear to perform as well the traditional model of care in their  
31 ability to identify patients with NSTEMI-ACS who will benefit from revascularization.  
32 Importantly these diagnostic criteria identify these patients more quickly. This is key to the  
33 success of a model that aims to transfer patients direct from the Emergency Department to the  
34 cardiac centre in a systematic way.  
35  
36  
37  
38  
39  
40  
41  
42  
43  
44  
45

46  
47 The inclusion criteria for the pre-HAC-X and post-HAC-X cohorts are subtly different. Pre-  
48 HAC-X, patients with suspected NSTEMI-ACS were admitted to the DGH for medical  
49 stabilization and cardiology review. If a local cardiologist confirmed the diagnosis of NSTEMI-  
50 ACS, and felt coronary angiography was appropriate, then the patients were transferred to the  
51 interventional cardiac centre for invasive investigation and management. Thus the pre-HAC-  
52  
53  
54  
55  
56  
57  
58  
59  
60

1  
2  
3 X cohort consisted only of patients with confirmed NSTEMI-ACS undergoing coronary  
4 angiography. The post HAC-X cohort consisted of patients with suspected NSTEMI-ACS  
5 transferred directly from the Emergency Department. The diagnosis of NSTEMI-ACS was not  
6 confirmed until cardiology review at the cardiac centre, and inevitably the post-HAC-X  
7 cohort contained some patients who proved to have an alternate diagnosis and did not  
8 undergo coronary angiography.  
9  
10  
11  
12  
13  
14  
15  
16  
17  
18

19 Patients with a final non-cardiac diagnosis comprised about 15% of post-HAC-X patients.  
20 This group incorporated both patients who failed to meet the pathway's inclusion criteria who  
21 were transferred inappropriately and patients who had chest pain with an abnormal ECG but  
22 who were subsequently shown to have a negative troponin measured 12 hours after onset of  
23 symptoms. In patients in whom myocardial infarction was suspected at presentation, the rapid  
24 access to coronary angiography and early demonstration of unobstructed coronary arteries  
25 allowed other cardiac diagnoses to be considered. In patients with a 'non-coronary' cardiac  
26 diagnosis, such as myocarditis, the early access to advanced non-invasive cardiac imaging at  
27 the cardiac centre undoubtedly streamlined their hospital admission, allowing earlier  
28 diagnosis and treatment. The small proportion of patients transferred with a non-cardiac  
29 diagnosis could be treated then discharged rapidly and safely from the cardiac centre,  
30 meaning that they were little burden upon our resources. Although we strived to manage the  
31 vast majority of post HAC-X patients exclusively at the cardiac centre, a small proportion of  
32 patients with a non-cardiac diagnosis were 'repatriated' to their district hospital for  
33 specialized further management of their condition.  
34  
35  
36  
37  
38  
39  
40  
41  
42  
43  
44  
45  
46  
47  
48  
49  
50  
51  
52  
53

54 It should be noted that direct comparison of pre-HAC-X and post-HAC-X patients is  
55 problematic. Inclusion to the study occurred once patients were transferred to the cardiac  
56 centre.  
57  
58  
59  
60

1  
2  
3 centre (for coronary angiography in pre-HAC-X patients, and with suspected NSTEMI-ACS for  
4 assessment and/or coronary angiography in post-HAC-X patients) rather than at the district  
5 hospital. As a result, a proportion of patients in the post-HAC-X group, after review at the  
6 cardiac centre were thought to have a non-coronary diagnosis, and did not undergo coronary  
7 angiography. Undoubtedly, before the initiation of the HAC-X pathway a number of patients  
8 were admitted to the district hospital with suspected NSTEMI-ACS, but this diagnosis was  
9 discounted after local cardiology review. These patients initially suspected to have NSTEMI-  
10 ACS, but later proven to have a non-coronary diagnosis, whilst still in their district hospital  
11 were not included in the pre-HAC-X cohort. Furthermore, there are important differences in  
12 the baseline demographics between the patient cohorts (Table 2). Post-HAC-X patients were  
13 younger, more likely to be current smokers and more commonly had a history of  
14 hypercholesterolaemia, previous PCI and peripheral vascular disease. There are several  
15 potential explanations for these differences in cohort demographics. Firstly, the presence of  
16 coronary risk factors or a history of previous PCI in patients presenting to the emergency  
17 department with chest pain is likely to stimulate early cardiac investigations. Inclusion  
18 criteria for the HAC-X pathway were diagnosis of NSTEMI-ACS whilst in the Emergency  
19 Department. Older patients with a paucity of coronary risk factors and no previous cardiac  
20 history may have had a delayed NSTEMI-ACS diagnosis meaning they could not be transferred  
21 directly from the Emergency Department via the HAC-X pathway. Secondly, patients with  
22 major medical comorbidities that precluded early angiography were specifically excluded  
23 from the HAC-X pathway. This is likely to introduce a degree of selection bias within the  
24 cohorts. The post-HAC-X cohort was generally younger and fitter, and this may have  
25 facilitated early discharge and a reduced length of hospital stay. Importantly, NSTEMI-ACS  
26 patients with exclusions to the HAC-X pathway who were clinically unstable were always  
27  
28  
29  
30  
31  
32  
33  
34  
35  
36  
37  
38  
39  
40  
41  
42  
43  
44  
45  
46  
47  
48  
49  
50  
51  
52  
53  
54  
55  
56  
57  
58  
59  
60

1  
2  
3 transferred to the interventional centre for further management, although these patients are  
4  
5 not represented in this study.  
6  
7

8  
9 **Limitations of study:** A number of limitations of this study are worthy of note; firstly, this  
10 was an observational study designed to evaluate the feasibility of a novel change in practice  
11 to reduce waiting times for coronary angiography in patients with NSTEMI-ACS. We did not  
12 collect clinical outcome data upon the entire cohort and so can only speculate as to whether  
13 the initiation of this pathway provided clinical benefit to the patients presenting with NSTEMI-  
14 ACS. Secondly point of care troponin testing was not available in the emergency departments  
15 until the initiation of the HAC-X pathway. Thus pre-HAC-X, patients will have undergone  
16 laboratory troponin testing whereas post-HAC-X patients underwent point of care troponin  
17 testing. These troponin assays, have differing sensitivity and specificities; for example point  
18 of care assays are designed to be highly sensitive, but may lack specificity compared with  
19 standard laboratory assays [11]. This may predispose to the inclusion of patients with  
20 presumed NSTEMI-ACS who subsequently receive a non-cardiac diagnosis. Despite this  
21 limitation inappropriate transfers via the HAC-X pathway were infrequent. The HAC-X  
22 clinical pathway was designed to identify patients with NSTEMI-ACS whilst they remained in  
23 the Emergency Department. There are patients with suspected NSTEMI-ACS with an initially  
24 normal ECG and negative point of care troponin, that develop ECG abnormalities or a  
25 positive troponin assay later in their hospital admission. Thus some patients with NSTEMI-ACS  
26 continued to be admitted to the DGH even after the initiation of the HAC-X pathway. NSTEMI-  
27 ACS patients admitted to the DGH, in the post-HAC-X era were managed in a similar fashion  
28 to pre-HAC-X patients, with medical stabilization and transfer to the interventional centre  
29 once a bed became available. We have not collected data upon this small group of patients.  
30 We do not know how the inclusion of these patients may have affected our results. Thirdly,  
31  
32  
33  
34  
35  
36  
37  
38  
39  
40  
41  
42  
43  
44  
45  
46  
47  
48  
49  
50  
51  
52  
53  
54  
55  
56  
57  
58  
59  
60

1  
2  
3 two of the six DGH's served by the London Chest Hospital have on-site cardiac  
4 catheterization laboratories offering diagnostic coronary angiography but not PCI.  
5  
6  
7 Potentially, a small number of patients with suspected NSTEMI-ACS could have undergone  
8 diagnostic coronary angiography locally and then either been discharged if no coronary  
9 revascularization was indicated or referred directly for coronary surgery. As patient data for  
10 this study was collected only after referral for coronary angiography and/or PCI at the  
11 interventional centre these patients with NSTEMI-ACS bypassed study enrolment and thus are  
12 not represented within the study cohort. However, we believe that the standardized transfer  
13 criteria for NSTEMI-ACS patients central to the HAC-X pathway would make DGH admission  
14 and local angiography for NSTEMI-ACS patients less common in the post-HAC-X period.  
15  
16 Finally, the cardiac centre increased bed capacity, providing a dedicated 6 bed ward for  
17 patients admitted via the HAC-X pathway. The small increase in the total bed capacity of the  
18 hospital coupled with more efficient utilization of inpatient beds allowed the HAC-X  
19 pathway to function. Potentially, these changes may confound our results, as they may  
20 influence both time to coronary angiography and length of hospital stay.  
21  
22  
23  
24  
25  
26  
27  
28  
29  
30  
31  
32  
33  
34  
35  
36  
37  
38  
39  
40  
41  
42  
43  
44  
45  
46  
47  
48  
49  
50  
51  
52  
53  
54  
55  
56  
57  
58  
59  
60

## THE FUTURE

Delivery of coronary angiography within 96 hours for NSTEMI-ACS patients admitted to hospitals without facilities for invasive cardiac investigations is challenging. The HAC-X pathway is effective in identifying patients with NSTEMI-ACS for transfer directly to the regional cardiac centre avoiding unnecessary delays in treatment. Use of this model, modified according to local circumstances, could be applied nationally to streamline the management of NSTEMI-ACS patients. The investment required for 'HAC-X' beds would be more than offset by the resulting savings in hospital bed days.

## CONCLUSION

The introduction of this novel care pathway was associated with significant reductions in time to angiography and in total hospital bed occupancy for patients with NSTEMI-ACS. We have demonstrated its feasibility in routine clinical practice so this model could be used more widely to streamline the management of NSTEMI-ACS patients.

## References

1. Keeley E, Boura J, Grines C. Primary angioplasty versus intravenous thrombolytic therapy for acute myocardial infarction: a quantitative review of 23 randomised trials. *Lancet* 2003; 361:13-20.
2. Van De Werf F, Bax J, Betriu A, Blomstrom-Lundqvist C, Crea F, Falk V, Filippatos G, Fox K, Huber K, Kastrati A, Rosengren A, Steg P, Tubaro M, Verheugt F, Weidinger F, Weis M. Management of acute myocardial infarction in patients presenting with persistent ST-segment elevation: the Task Force on the Management of ST-Segment Elevation Acute Myocardial Infarction of the European Society of Cardiology. *Eur Heart J* 2008; 29:2909-2945.
3. Myocardial Ischaemia National Audit Project: How the NHS cares for patients with heart attack. 2010; London:
4. Allen L, O'Donnell CJ, Camargo CJ, Giugliano R, Lloyd-Jones DM. Comparison of long-term mortality across the spectrum of acute coronary syndromes. *Am Heart J* 2006; 151:1065-1071.
5. Hamm C, Bassand J, Agewall S, Bax J, Boersma E, Bueno H, Caso P, Dudek D, Gielen S, Huber K, Ohman M, Petrie M, Sonntag F, Uva M, Storey R, Wijns W, Zahger D, Bax J, Auricchio A, Baumgartner H, Ceconi C, Dean V, Deaton C, Fagard R, Funck-Brentano C, Hasdai D, Hoes A, Knuuti J, Kolh P, McDonagh T, Moulin C, Poldermans D, Popescu B, Reiner Z, Sechtem U, Sirnes P, Torbicki A, Vahanian A, Windecker S, Windecker S, Achenbach S, Badimon L, Bertrand M, Botker H, Collet J, Crea F, Danchin N, Falk E, Goudevenos J, Gulba D, Hambrecht R, Herrmann J, Kastrati A, Kjeldsen K, Kristensen S, Lancellotti P, Mehilli J, Merkely B, Montalescot G, Neumann F, Neyses L, Perk J, Roffi M, Romeo F, Ruda M, Swahn E, Valgimigli M, Vrints C, Widimsky P. ESC Guidelines for the management of acute coronary syndromes in patients presenting without persistent ST-segment elevation: The Task Force for the management of acute coronary syndromes (ACS) in patients presenting without persistent ST-segment elevation of the European Society of Cardiology (ESC). *Eur Heart J* 2011; 32:2999-3054.
6. Bellenger N, Eichhofer J, Crone D, Curzen N. Hospital stay in patients with non-ST-elevation acute coronary syndromes. *Lancet* 2004; 363:1399-1400.
7. CHD Collaborative. National Interhospital Transfer Audit. Presented at the CHD national transfer meeting 2004 and the British Cardiac Society annual meeting 2004. <http://www.heart.nhs.uk>.
8. Bellenger N, Wells T, Hitchcock R, Watkins M, Duffet C, Jewell D, Palliser D, Shapland L, Curtis R, Scrase S, Burns R, Curzen N. Reducing transfer times for coronary angiography in patients with acute coronary syndromes: one solution to a national problem. *Postgrad Med J* 2006; 82:411-413.

1  
2  
3 9. Andersen J, Klow N, Johansen O. Safe and feasible immediate retransfer of patients to the  
4 referring hospital after acute coronary angiography and percutaneous coronary angioplasty  
5 for patients with acute coronary syndrome. *Eur Heart J Acute Cardiovasc Care* 2013; 2:256-  
6 261.  
7

8  
9 10. Zia M, Goodman S, Peterson E, Mulgund J, Chen A, Langer A, Tan M, Ohman E, Gibler  
10 W, Pollack CJ, Roe M. Paradoxical use of invasive cardiac procedures for patients with non-  
11 ST segment elevation myocardial infarction: an international perspective from the  
12 CRUSADE Initiative and the Canadian ACS Registries I and II. *Can J Cardiol* 2007;  
13 23:1073-1079.  
14

15  
16 11. Bock J, Singer A, Thode HJ. Comparison of emergency department patient classification  
17 by point-of-care and central laboratory methods for cardiac troponin I. *Am J Clin Pathol*  
18 2008; 130:132-135.  
19  
20  
21  
22  
23  
24  
25  
26  
27  
28  
29  
30  
31  
32  
33  
34  
35  
36  
37  
38  
39  
40  
41  
42  
43  
44  
45  
46  
47  
48  
49  
50  
51  
52  
53  
54  
55  
56  
57  
58  
59  
60



## Footnotes

**Contributions:** SG and AJ conceived and designed the study. SG, MJL, DAJ, EF, SC, ZB and RAA acquired the data. SG, MJL, DAJ, and AJ analysed and interpreted the data. SG and MJL carried out statistical analysis. SG, MJL, RAA, AW and AJ drafted the original manuscript. SG, MJL, DAJ, AW, SC, EJS, RAA, CK, AM, MTR and AJ critically revised the manuscript for important intellectual content.

**Funding:** There was no funding for this study.

**Conflicts of interests:** None of the authors of this manuscript have any conflicts of interest to declare.

Table 1. Inclusion and Exclusion Criteria for HAC-X clinical pathway

|                           |                                                                                                                                                                                            |
|---------------------------|--------------------------------------------------------------------------------------------------------------------------------------------------------------------------------------------|
| <b>Inclusion criteria</b> | <b>Symptoms suggestive of myocardial ischaemia</b><br>With a positive troponin assay<br>OR ECG changes including:<br>ST depression;<br>T wave inversion in V1-4;<br>Dynamic T wave changes |
| <b>Exclusion criteria</b> | Unexplained anaemia (Hb <10 g/dL)<br>Hypoxia<br>Acute renal failure<br>Loss of consciousness(unless secondary to cardiac arrhythmia)<br>Recent trauma<br>Overt sepsis                      |

1  
2  
3 **Table 2. Evidence based immediate medical therapy for patients with NSTEMI treated**  
4 **via the HAC-X clinical pathway**  
5

6 Immediate evidence based therapy given at DGH included,  
7

8 Aspirin 300mg

9 Clopidogrel 600 mg

10 Fondaparinux 2.5 mg

11 Eptifibatide bolus (180 mg/kg) as long as no contraindications  
12  
13  
14  
15  
16  
17  
18  
19  
20  
21  
22  
23  
24  
25  
26  
27  
28  
29  
30  
31  
32  
33  
34  
35  
36  
37  
38  
39  
40  
41  
42  
43  
44  
45  
46  
47  
48  
49  
50  
51  
52  
53  
54  
55  
56  
57  
58  
59  
60

**Table 3. Clinical Characteristics of the study cohort**

| Variables                                 | Pre-HAC-X<br>n=391 | Post-HAC-X<br>n=311 | p value |
|-------------------------------------------|--------------------|---------------------|---------|
| <b>Age (years)</b>                        | 65.2 +/-12.6       | 57.0 +/-13.9        | <0.001  |
| <b>Gender:</b>                            |                    |                     | 0.884   |
| Male (%)                                  | 70.8               | 70.0                |         |
| Female (%)                                | 29.2               | 30.0                |         |
| <b>Smoking status:</b>                    |                    |                     | 0.009   |
| Current (%)                               | 18.2               | 29.6                |         |
| Ex-smoker (%)                             | 30.4               | 31.9                |         |
| Never (%)                                 | 51.4               | 41.2                |         |
| <b>Diabetes:</b>                          |                    |                     | 0.205   |
| Insulin requiring (%)                     | 6.1                | 9.7                 |         |
| Non-Insulin requiring(%)                  | 24.8               | 22.6                |         |
| Not diabetic (%)                          | 69.1               | 67.7                |         |
| <b>Hypertension (%)</b>                   | 62.7               | 59.7                | 0.241   |
| <b>Hypercholesterolaemia (%)</b>          | 46.0               | 51.3                | 0.001   |
| <b>Previous myocardial infarction (%)</b> | 30.7               | 34.9                | 0.29    |
| <b>Previous PCI (%)</b>                   | 14.1               | 25.5                | <0.001  |
| <b>Previous CABG (%)</b>                  | 11.5               | 11.2                | 0.994   |
| <b>Peripheral vascular disease (%)</b>    | 1.5                | 6.0                 | 0.003   |
| <b>Previous stroke (%)</b>                | 6.7                | 8.1                 | 0.58    |

## Figure Legends

**Figure 1.** Flow diagram of patients with suspected ACS treated before (Pre-HAC-X) and after (Post-HAC-X) the initiation of the HAC-X clinical pathway describing access to coronary angiography and subsequent management strategy

**Figure 2.** Bee swarm boxplot demonstrating the time the ED admission to coronary angiography for patients with suspected ACS treated before (Pre-HAC-X) and after (Post-HAC-X) the initiation of the HAC-X clinical pathway. Each point represents the time taken to undergo coronary angiography for an individual patient.

**Figure 3.** The proportion of patients with suspected ACS undergoing coronary angiography within recommended 96 hours of hospital admission before (Pre-HAC-X) and after (Post-HAC-X) the initiation of the HAC-X clinical pathway.

1  
2  
3  
4  
5  
6  
7  
8  
9  
10  
11  
12  
13  
14  
15  
16  
17  
18  
19  
20  
21  
22  
23  
24  
25  
26  
27  
28  
29  
30  
31  
32  
33  
34  
35  
36  
37  
38  
39  
40  
41  
42  
43  
44  
45  
46  
47  
48  
49  
50  
51  
52  
53  
54  
55  
56  
57  
58  
59  
60

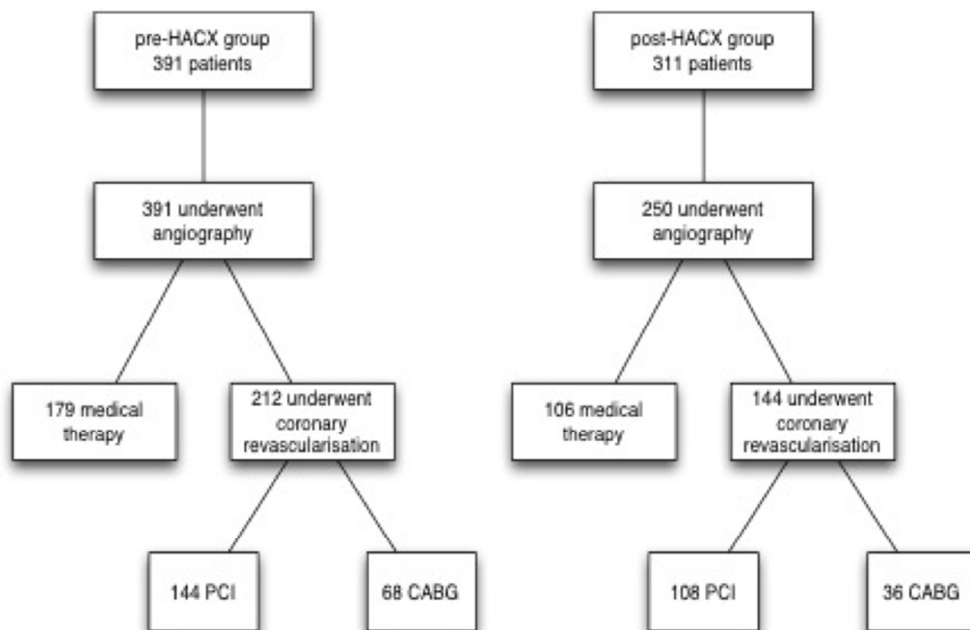

Flow diagram of patients with suspected ACS treated before (Pre-HAC-X) and after (Post-HAC-X) the initiation of the HAC-X clinical pathway describing access to coronary angiography and subsequent management strategy

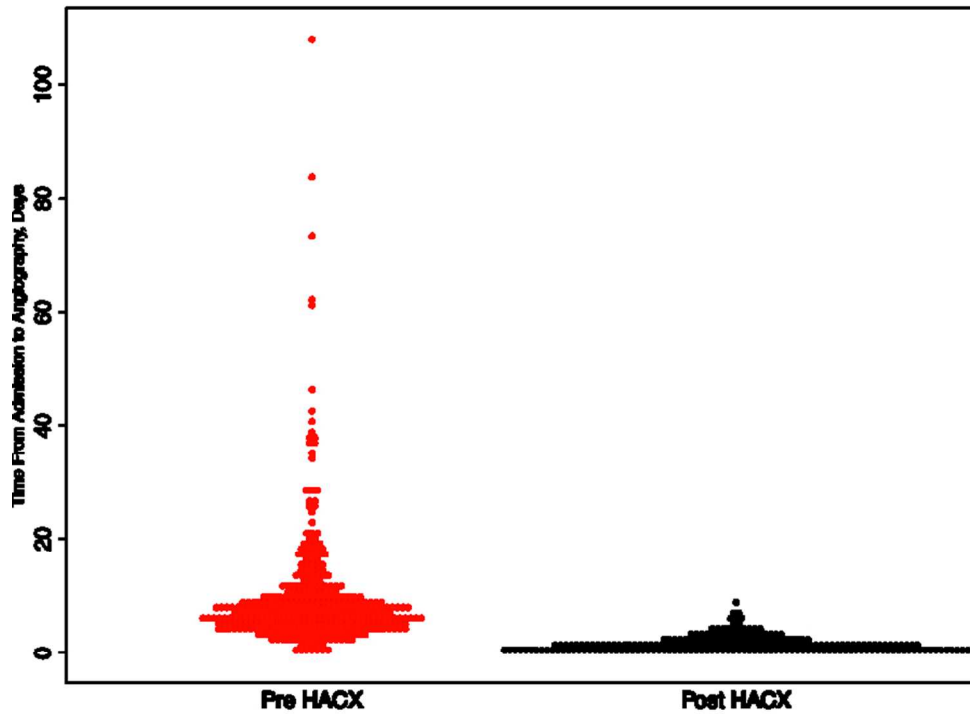

Bee swarm boxplot demonstrating the time the ED admission to coronary angiography for patients with suspected ACS treated before (Pre-HAC-X) and after (Post-HAC-X) the initiation of the HAC-X clinical pathway. Each point represents the time taken to undergo coronary angiography for an individual patient.

1  
2  
3  
4  
5  
6  
7  
8  
9  
10  
11  
12  
13  
14  
15  
16  
17  
18  
19  
20  
21  
22  
23  
24  
25  
26  
27  
28  
29  
30  
31  
32  
33  
34  
35  
36  
37  
38  
39  
40  
41  
42  
43  
44  
45  
46  
47  
48  
49  
50  
51  
52  
53  
54  
55  
56  
57  
58  
59  
60

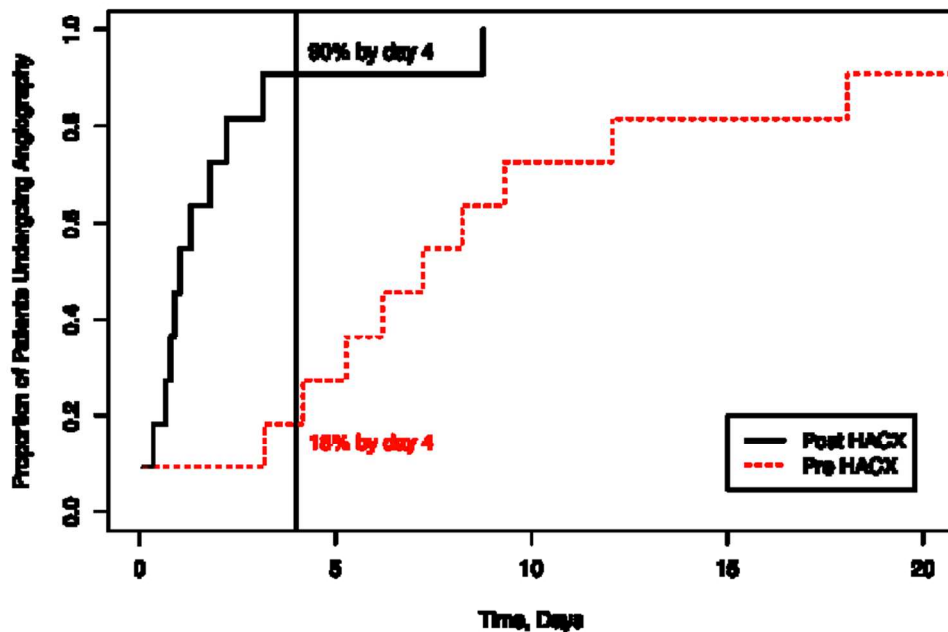

The proportion of patients with suspected ACS undergoing coronary angiography within recommended 96 hours of hospital admission before (Pre-HAC-X) and after (Post-HAC-X) the initiation of the HAC-X clinical pathway.

ew only
